# Supplementary material for: One-pot mechanochemical access to quinoline-linked covalent organic frameworks
Source: Royal Society of Chemistry journal article supplement (doi:10.1039/d6ra01241h), 2026-04-21
Supplement: d6ra01241h1.pdf [file d6ra01241h1.pdf]

## Supporting Information

### One-Pot Mechanochemical Access to Quinoline-Linked Covalent Organic Frameworks

Yizhou Zhan,<sup>†\*ac</sup> Yuxuan Yang,<sup>†a</sup> Wei Zhao,<sup>a</sup> Xi Wang,<sup>a</sup> Jiarong Qiu,<sup>a</sup> Zhaonan Tang,<sup>d</sup> Jiao He,<sup>e</sup> Chenglong Deng,<sup>e</sup> Heshen Xiao,<sup>f</sup> Yiying Pang <sup>\*bc</sup> and Xiaoji Wang <sup>\*bc</sup>

<sup>a</sup>School of Materials Science and Engineering, Dongguan University of Technology, Dongguan, 523808, P.R. China.

<sup>b</sup>School of Chemical Engineering and Energy Technology, Dongguan University of Technology, Dongguan, 523808, P.R. China.

<sup>c</sup>Songshan Lake Innovation Center of Medicine and Engineering, Dongguan University of Technology, Dongguan, 523808, P.R. China.

<sup>d</sup>School of Life and Health Technology, Dongguan University of Technology, Dongguan 523808, P.R. China.

<sup>e</sup>College of Chemistry and Environmental Engineering, Key Laboratory of Green Catalysis of Higher Education Institutes of Sichuan, Sichuan University of Science and Engineering, Zigong 643000, P. R. China.

<sup>f</sup>Analytical and Testing center, Dongguan University of Technology, Dongguan, 523808, P.R. China.

#### Corresponding authors.

E-mail addresses: [zhanyizhou@dgut.edu.cn](mailto:zhanyizhou@dgut.edu.cn) (Y. Zhan), [pangyiying@dgut.edu.cn](mailto:pangyiying@dgut.edu.cn) (Y. Pang), [wangxj@dgut.edu.cn](mailto:wangxj@dgut.edu.cn) (X. Xiao)

<sup>†</sup>Y. Zhan and Y. Yang contributed equally to this work

#### Table of Contents

|                                                     |         |
|-----------------------------------------------------|---------|
| Synthesis of COF Materials.....                     | S2–S23  |
| Characterizations of COF Materials.....             | S24–S31 |
| Chemical Stability Test.....                        | S32     |
| One-Pot Mechanochemical vs Solvothermal Routes..... | S32–S33 |

## Synthesis of COF Materials

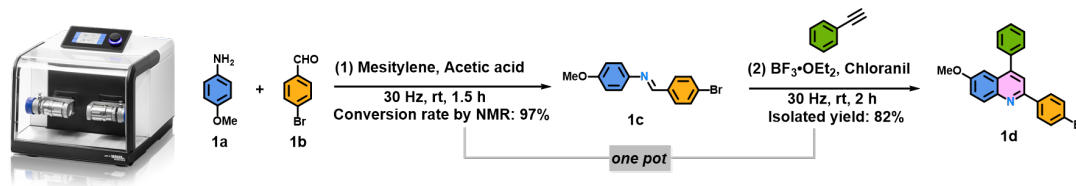

**Fig. S1.** Synthesis of Model Compound: 7 - Methoxy - 2 - (4 - bromophenyl) - 4 - phenylquinoline (**1d**).

Into a 10 mL stainless steel milling jar, 4-methoxyaniline (8.6 mg, 0.07 mmol, **1a**), 4-Bromobenzaldehyde (12.9 mg, 0.07 mmol, **1b**), mesitylene (40  $\mu\text{L}$ ), and glacial acetic acid (20  $\mu\text{L}$ ) were added along with four 4 mm steel balls. The reaction mixture was milled in a Retsch MM 400 Mixer Mill at 30 Hz for 1.5 h at room temperature. A small amount of **1c** was taken for NMR calibration, and the conversion rate was calculated to be 97%. After that, phenylacetylene (23  $\mu\text{L}$ , 0.21 mmol),  $\text{BF}_3 \cdot \text{OEt}_2$  (10.4  $\mu\text{L}$ , 0.084 mmol), and chloranil (20.65 mg, 0.084 mmol) were added to the stainless steel milling jar, and the mixture was further milled at 30 Hz for 2 h at room temperature. After completion of the reaction, the product was transferred to an eggplant-shaped flask using a small amount of dichloromethane and dried on a rotary evaporator. The concentrated residue was purified by silica gel flash column chromatography using petroleum ether (PE)/ethyl acetate (EA) (10:1, v/v) as the eluent, yielding 7-Methoxy-2-(4-bromophenyl)-4-phenylquinoline (**1d**) as a light gray product with a yield of 82%.  $^1\text{H}$  NMR (400 MHz, Chloroform-*d*) of **1c**:  $\delta$  8.45 (s, 1H), 7.78 (d,  $J = 7.2$  Hz, 2H), 7.62 (d,  $J = 7.2$  Hz, 2H), 7.30 – 7.24 (m, 2H), 6.99 – 6.93 (m, 2H), 3.86 (s, 3H).;  $^1\text{H}$  NMR (400 MHz, Chloroform-*d*) of **1d**:  $\delta$  8.13 (d,  $J = 9.0$  Hz, 1H), 8.05 (d,  $J = 8.1$  Hz, 2H), 7.73 (s, 1H), 7.63 (d,  $J = 8.1$  Hz, 2H), 7.60 – 7.47 (m, 5H), 7.40 (d,  $J = 9.0$  Hz, 1H), 7.18 (s, 1H), 3.80 (s, 3H).;  $^{13}\text{C}$  NMR (101 MHz,  $\text{CDCl}_3$ ) of **1d**:  $\delta$  157.96, 153.23, 148.05, 144.78, 138.53, 138.49, 131.88, 131.49, 129.30, 128.81, 128.71, 128.71, 128.43, 126.77, 123.50, 122.06, 119.14, 103.68, 55.44. ; HRMS (ESI) of **1d** ( $\text{C}_{23}\text{H}_{16}\text{BrN}_2\text{O}^+$ ),  $m/z$  calculated for  $[\text{M} + \text{H}]^+$ : 415.0441, found 415.0404.

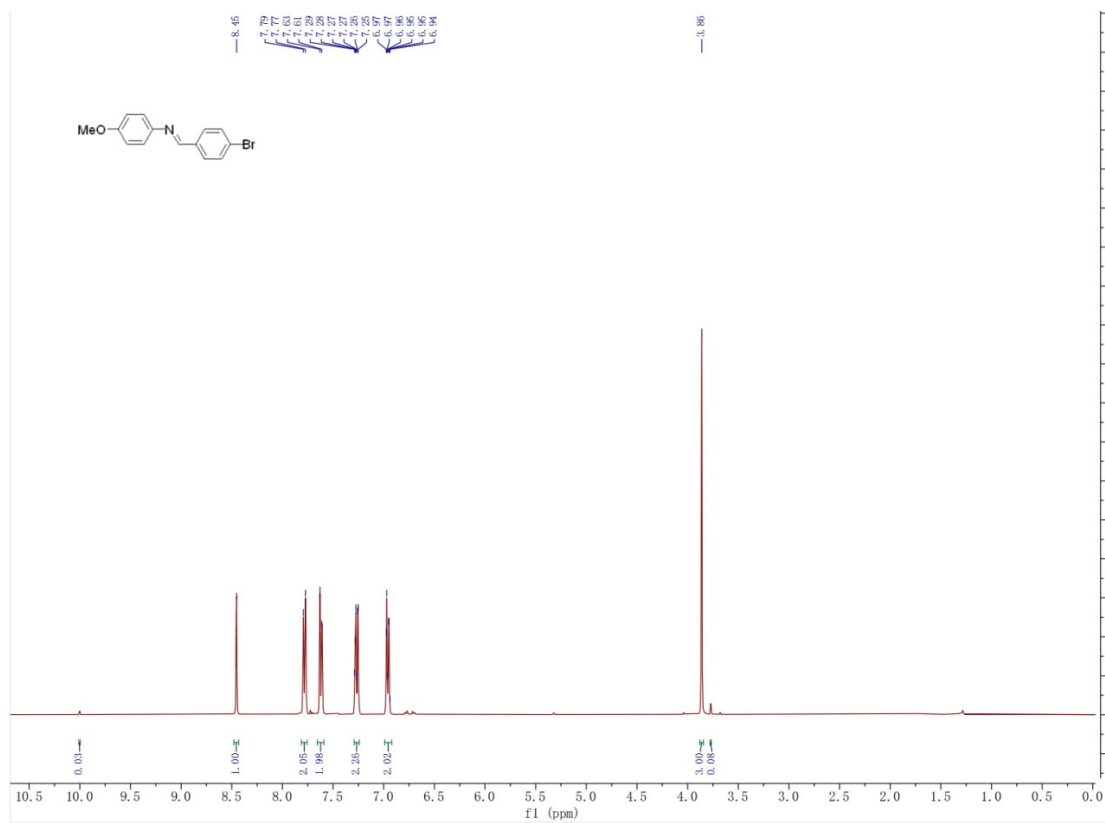

**Fig. S2.** <sup>1</sup>H NMR (400 MHz, Chloroform-*d*) of **1c**.

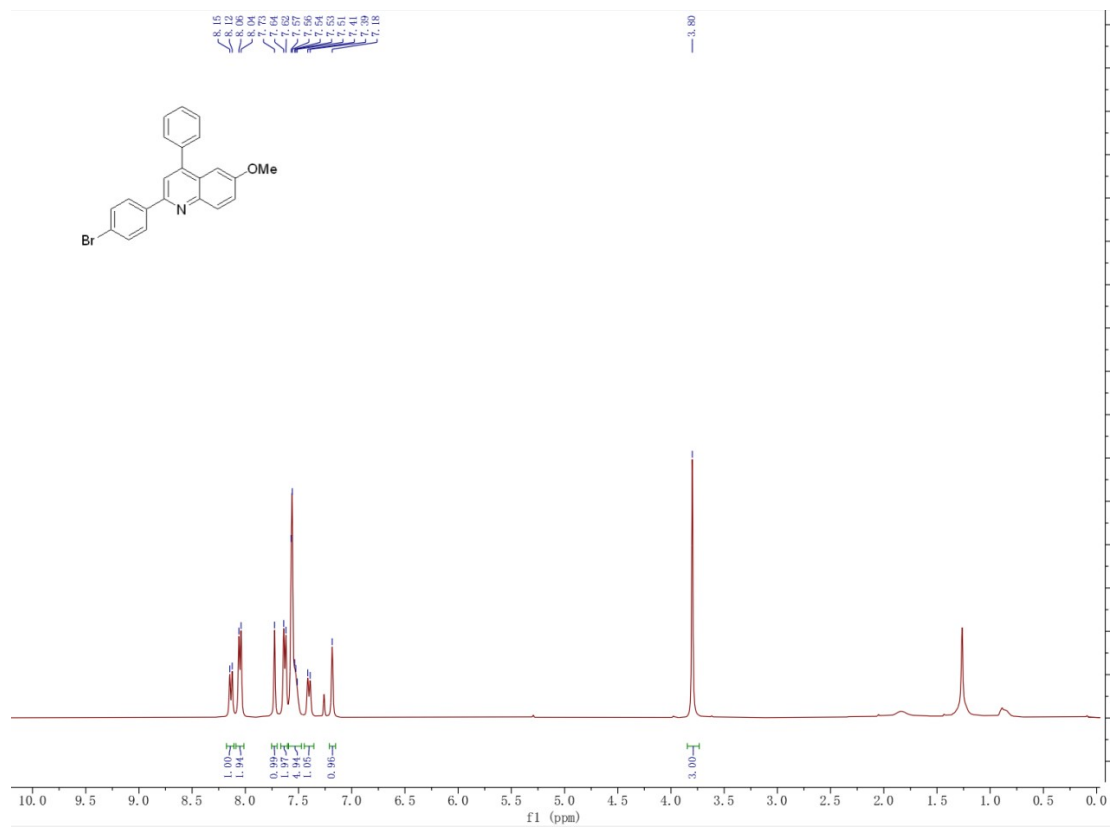

**Fig. S3.** <sup>1</sup>H NMR (400 MHz, Chloroform-*d*) of **1d**.

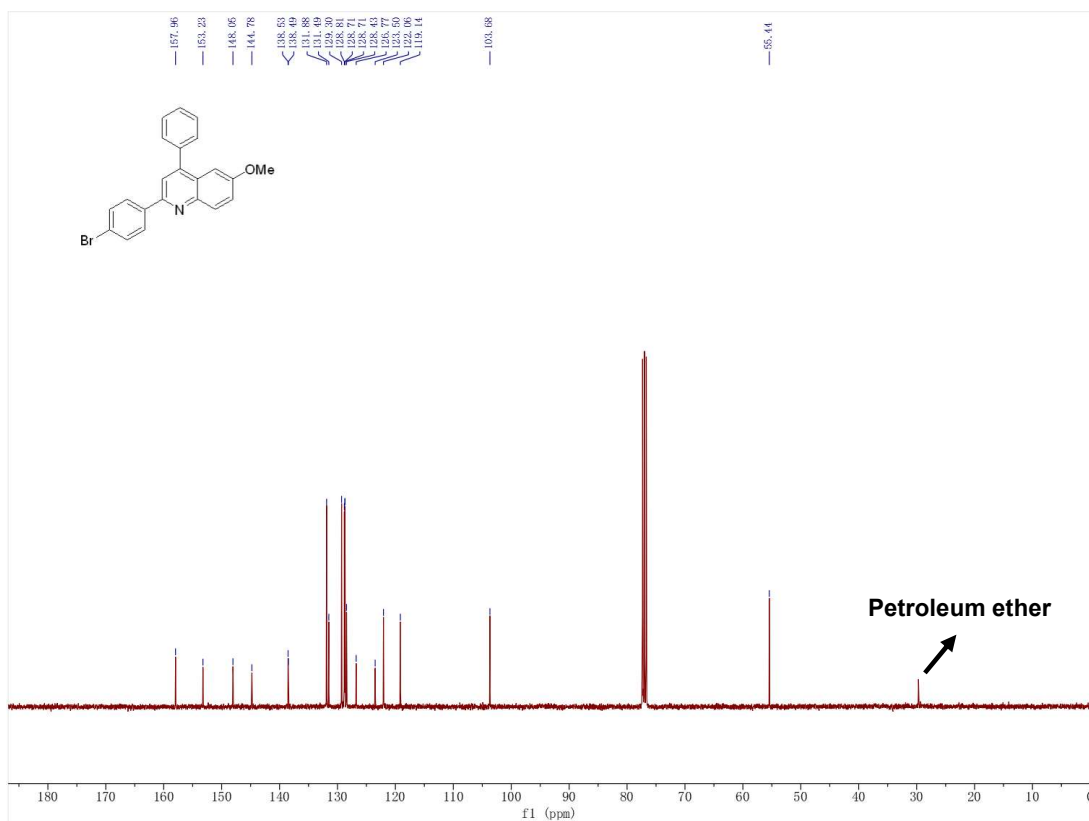

**Fig. S4.**  $^{13}\text{C}$  NMR (101 MHz,  $\text{CDCl}_3$ ) of **1d**.

### The synthesis of imine-linked COFs:

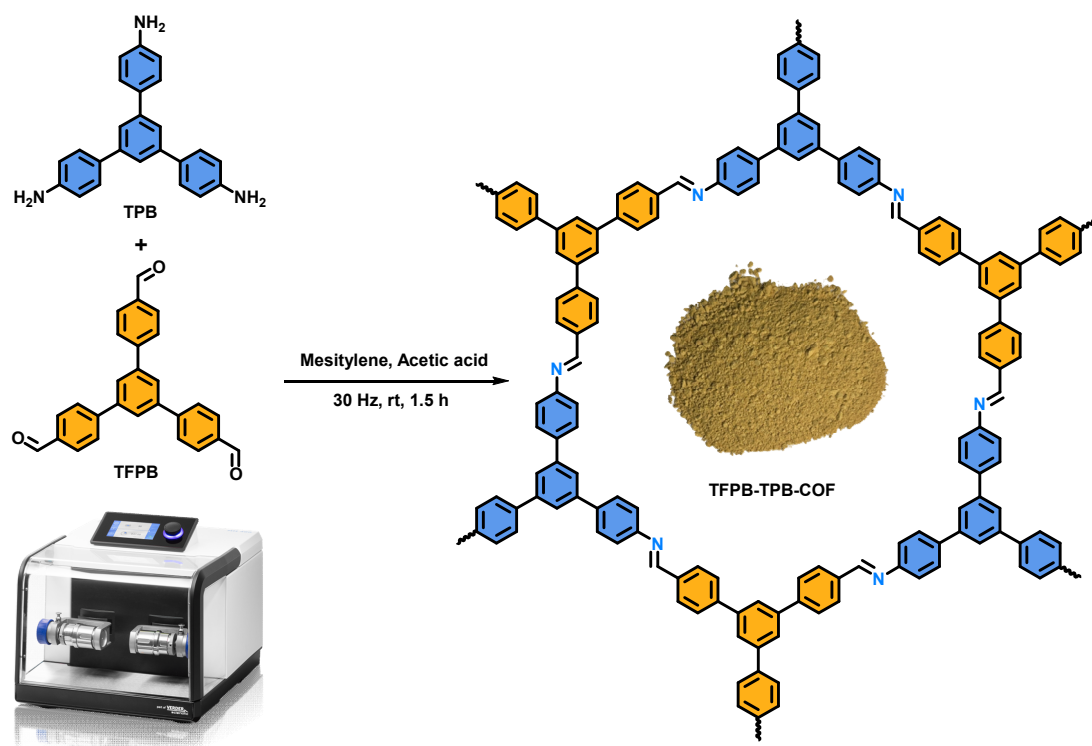

**Fig. S5.** Mechanochemical synthesis of TFPB-TPB-COF.

Into a 10 mL stainless steel milling jar, 1,3,5-tri(4-aminophenyl)benzene (TPB) (98.4 mg, 0.28 mmol), 1,3,5-tris(4-formylphenyl)benzene (TFPB) (109.3 mg, 0.28 mmol), mesitylene (160  $\mu$ L), and glacial acetic acid (80  $\mu$ L) were added along with four 4 mm steel balls. The reaction mixture was milled in a Retsch MM 400 Mixer Mill at 30 Hz for 1.5 h at room temperature. The solid in the stainless steel milling jar was removed, immersed in *N,N*-dimethylformamide (DMF) in a small glass vial, and ultrasonically dispersed for 2 min. The sample was transferred to a suction funnel, washed first with *N,N*-dimethylformamide (DMF) and then with acetone until the filtrate was colorless. It was transferred to filter paper and purified by Soxhlet extraction (using tetrahydrofuran) for 24 h. The wet powder was dried at 110  $^{\circ}$ C under a high vacuum overnight to produce TFPB-TPB-COF in an isolated yield of 98.3 % (189.2 mg).

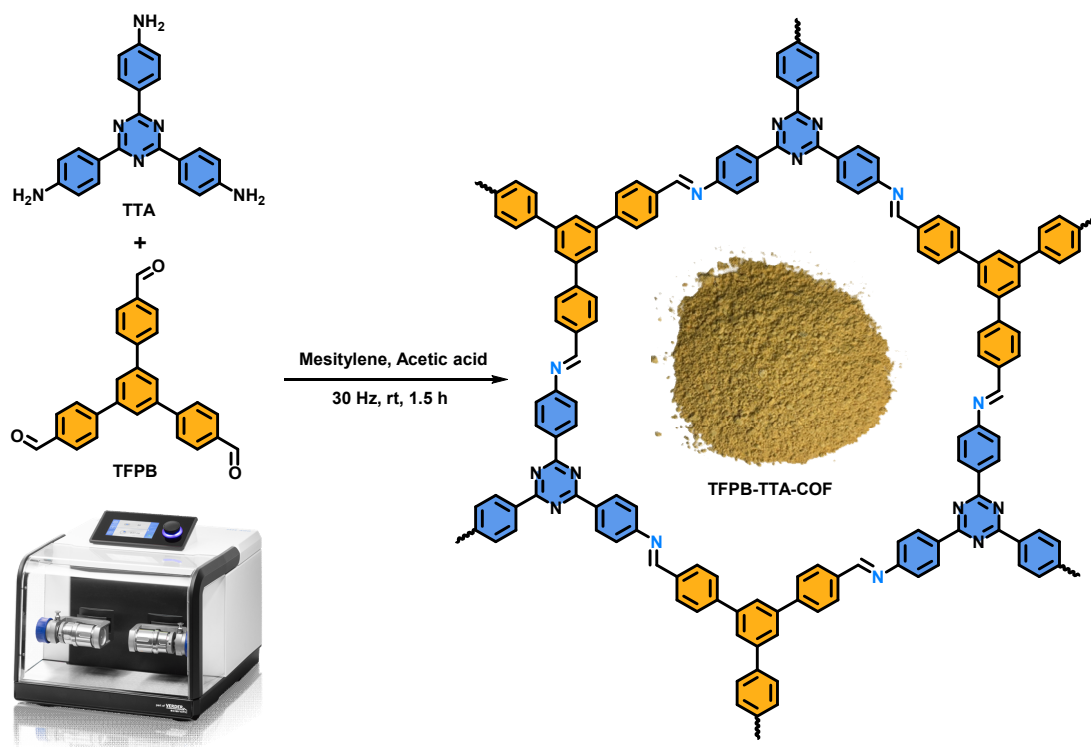

**Fig. S6.** Mechanochemical synthesis of TFPB-TTA-COF.

Into a 10 mL stainless steel milling jar, 4,4',4''-(1,3,5-triazine-2,4,6-triyl)trianiline (TTA) (99.2 mg, 0.28 mmol), 1,3,5-tris(4-formylphenyl)benzene (TFPB) (109.3 mg, 0.28 mmol), mesitylene (160  $\mu\text{L}$ ), and glacial acetic acid (80  $\mu\text{L}$ ) were added along with four 4 mm steel balls. The reaction mixture was milled in a Retsch MM 400 Mixer Mill at 30 Hz for 1.5 h at room temperature. The solid in the stainless steel milling jar was removed, immersed in *N,N*-dimethylformamide (DMF) in a small glass vial, and ultrasonically dispersed for 2 min. The sample was transferred to a suction funnel, washed first with *N,N*-dimethylformamide (DMF) and then with acetone until the filtrate was colorless. It was transferred to filter paper and purified by Soxhlet extraction (using tetrahydrofuran) for 24 h. The wet powder was dried at 110  $^{\circ}\text{C}$  under a high vacuum overnight to produce TFPB-TTA-COF in an isolated yield of 89.7 % (172.6 mg).

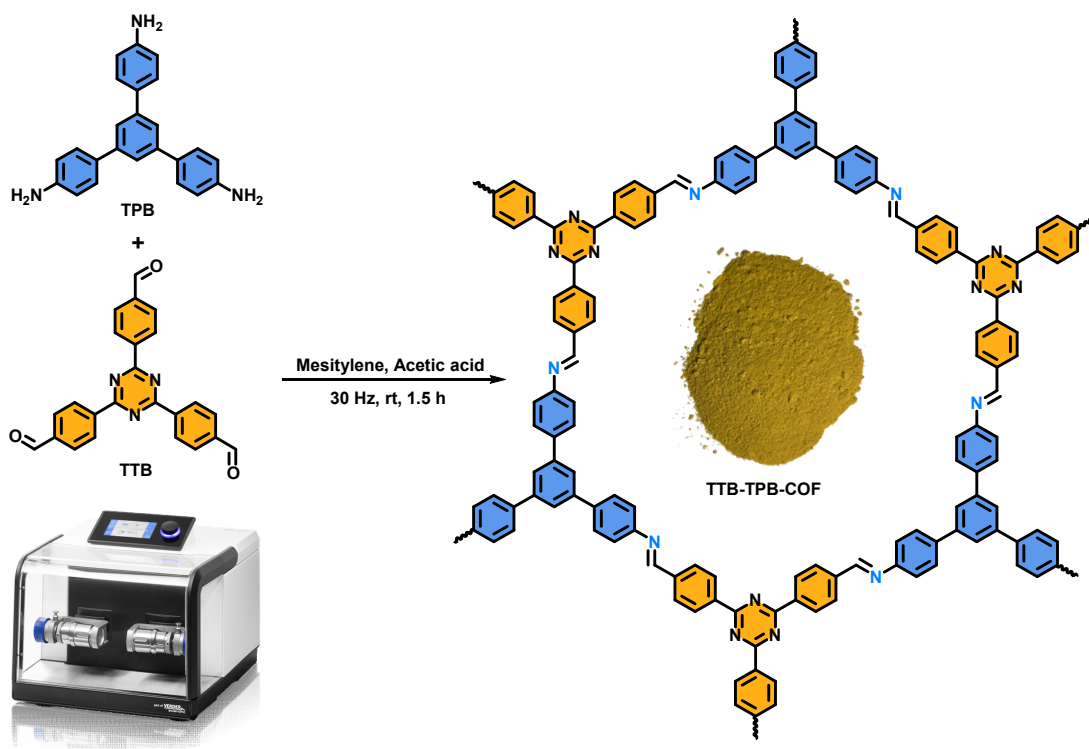

**Fig. S7.** Mechanochemical synthesis of TTB-TPB-COF.

Into a 10 mL stainless steel milling jar, 1,3,5-tri(4-aminophenyl)benzene (TPB) (98.4 mg, 0.28 mmol), 4,4',4''-(1,3,5-triazine-2,4,6-triyl) tribenzaldehyde (TTB) (110.1 mg, 0.28 mmol), mesitylene (160  $\mu$ L), and glacial acetic acid (80  $\mu$ L) were added along with four 4 mm steel balls. The reaction mixture was milled in a Retsch MM 400 Mixer Mill at 30 Hz for 1.5 h at room temperature. The solid in the stainless steel milling jar was removed, immersed in *N,N*-dimethylformamide (DMF) in a small glass vial, and ultrasonically dispersed for 2 min. The sample was transferred to a suction funnel, washed first with *N,N*-dimethylformamide (DMF) and then with acetone until the filtrate was colorless. It was transferred to filter paper and purified by Soxhlet extraction (using tetrahydrofuran) for 24 h. The wet powder was dried at 110  $^{\circ}$ C under a high vacuum overnight to produce TTB-TPB-COF in an isolated yield of 96.6 % (186.8 mg).

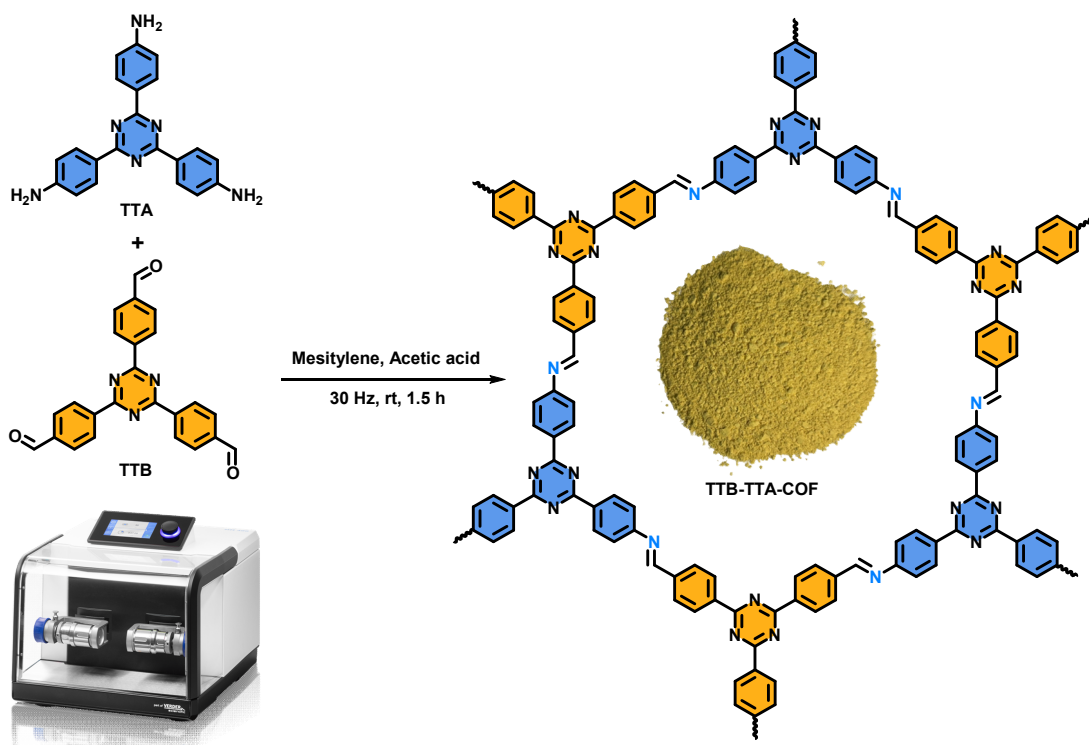

**Fig. S8.** Mechanochemical synthesis of TTB-TTA-COF.

Into a 10 mL stainless steel milling jar, 4,4',4''-(1,3,5-triazine-2,4,6-triyl)trianiline (TTA) (99.2 mg, 0.28 mmol), 4,4',4''-(1,3,5-triazine-2,4,6-triyl) tribenzaldehyde (TTB) (110.1 mg, 0.28 mmol), mesitylene (160  $\mu$ L), and glacial acetic acid (80  $\mu$ L) were added along with four 4 mm steel balls. The reaction mixture was milled in a Retsch MM 400 Mixer Mill at 30 Hz for 1.5 h at room temperature. The solid in the stainless steel milling jar was removed, immersed in *N,N*-dimethylformamide (DMF) in a small glass vial, and ultrasonically dispersed for 2 min. The sample was transferred to a suction funnel, washed first with *N,N*-dimethylformamide (DMF) and then with acetone until the filtrate was colorless. It was transferred to filter paper and purified by Soxhlet extraction (using tetrahydrofuran) for 24 h. The wet powder was dried at 110  $^{\circ}$ C under a high vacuum overnight to produce TTB-TTA-COF in an isolated yield of 99% (191.5 mg).

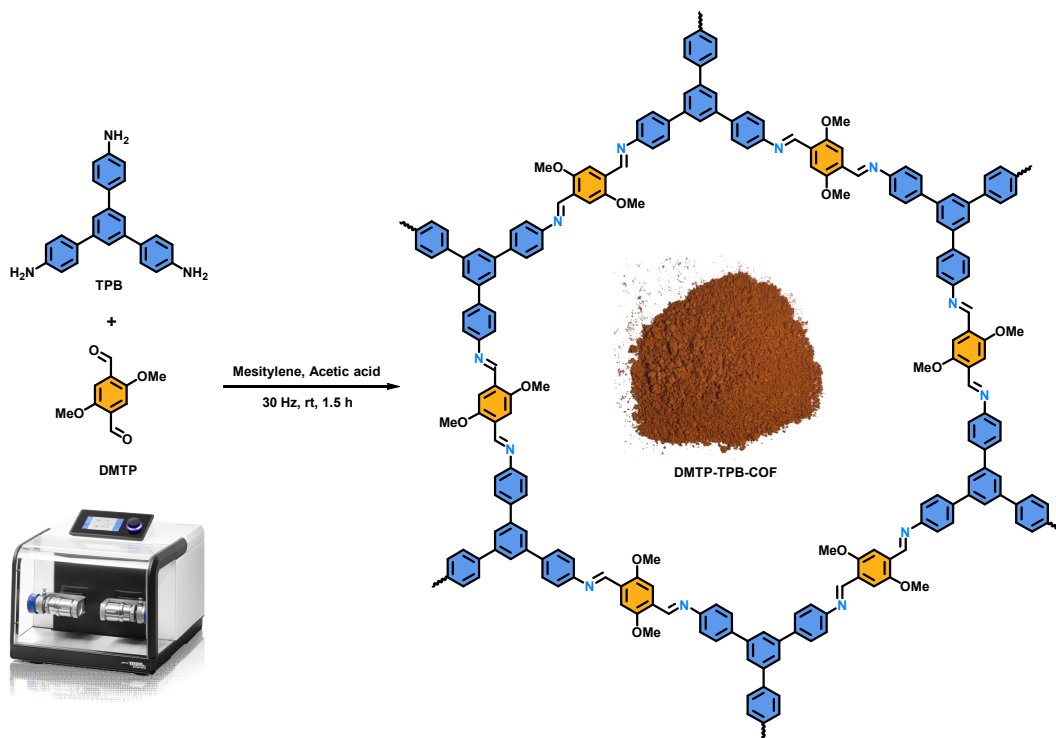

**Fig. S9.** Mechanochemical synthesis of DMTP-TPB-COF.

Into a 10 mL stainless steel milling jar, 1,3,5-tri(4-aminophenyl)benzene (TPB) (98.4 mg, 0.28 mmol), 2,5-dimethoxy terephthalaldehyde (DMTP) (81.6 mg, 0.42 mmol), mesitylene (160  $\mu$ L), and glacial acetic acid (80  $\mu$ L) were added along with four 4 mm steel balls. The reaction mixture was milled in a Retsch MM 400 Mixer Mill at 30 Hz for 1.5 h at room temperature. The solid in the stainless steel milling jar was removed, immersed in *N,N*-dimethylformamide (DMF) in a small glass vial, and ultrasonically dispersed for 2 min. The sample was transferred to a suction funnel, washed first with *N,N*-dimethylformamide (DMF) and then with acetone until the filtrate was colorless. It was transferred to filter paper and purified by Soxhlet extraction (using tetrahydrofuran) for 24 h. The wet powder was dried at 110  $^{\circ}$ C under a high vacuum overnight to produce TPB-DMTP-COF in an isolated yield of 97.2 % (160.2 mg).

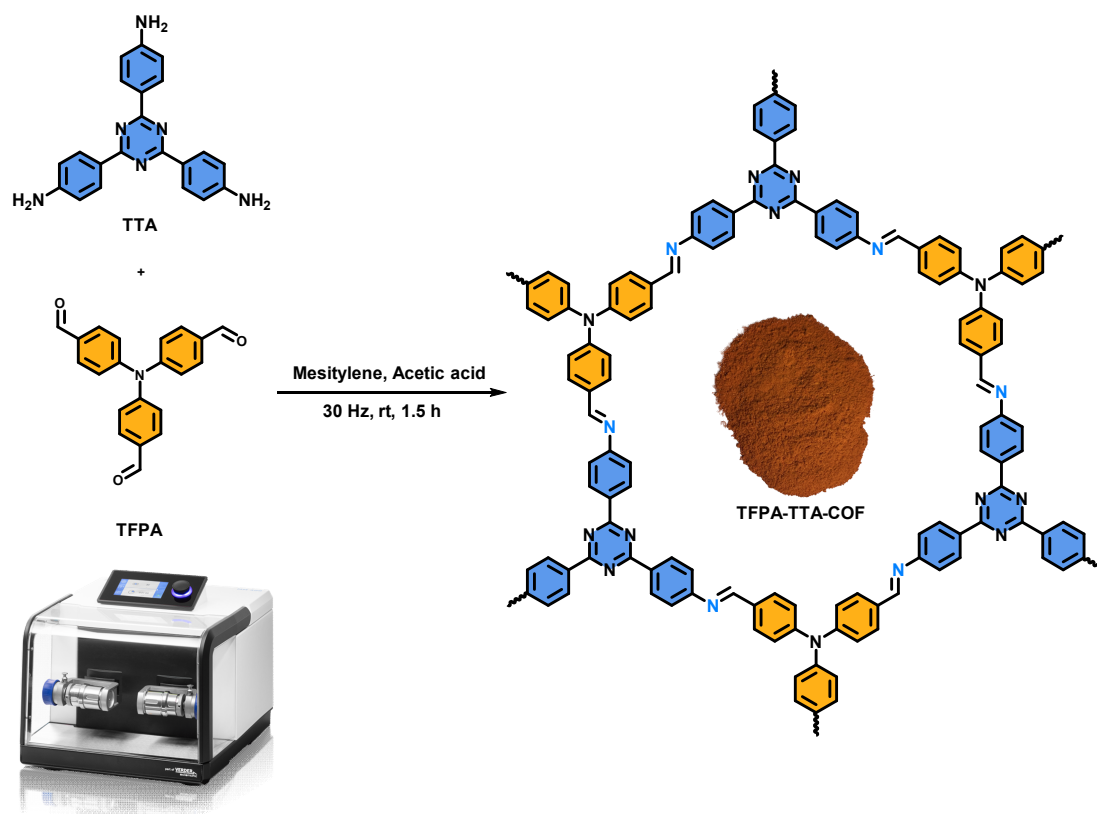

**Fig. S10.** Mechanochemical synthesis of TFPA-TTA-COF.

Into a 10 mL stainless steel milling jar, 4,4',4''-(1,3,5-triazine-2,4,6-triyl)trianiline (TTA) (99.2 mg, 0.28 mmol), tris(4-formylphenyl)amine (TFPA) (92.2 mg, 0.28 mmol), mesitylene (160  $\mu$ L), and glacial acetic acid (80  $\mu$ L) were added along with four 4 mm steel balls. The reaction mixture was milled in a Retsch MM 400 Mixer Mill at 30 Hz for 1.5 h at room temperature. The solid in the stainless steel milling jar was removed, immersed in N,N-dimethylformamide (DMF) in a small glass vial, and ultrasonically dispersed for 2 min. The sample was transferred to a suction funnel, washed first with N,N-dimethylformamide (DMF) and then with acetone until the filtrate was colorless. It was transferred to filter paper and purified by Soxhlet extraction (using tetrahydrofuran) for 24 h. The wet powder was dried at 110  $^{\circ}$ C under a high vacuum overnight to produce TFPA-TTA-COF in an isolated yield of 99 % (173.8 mg).

## The synthesis of quinoline-linked COFs:

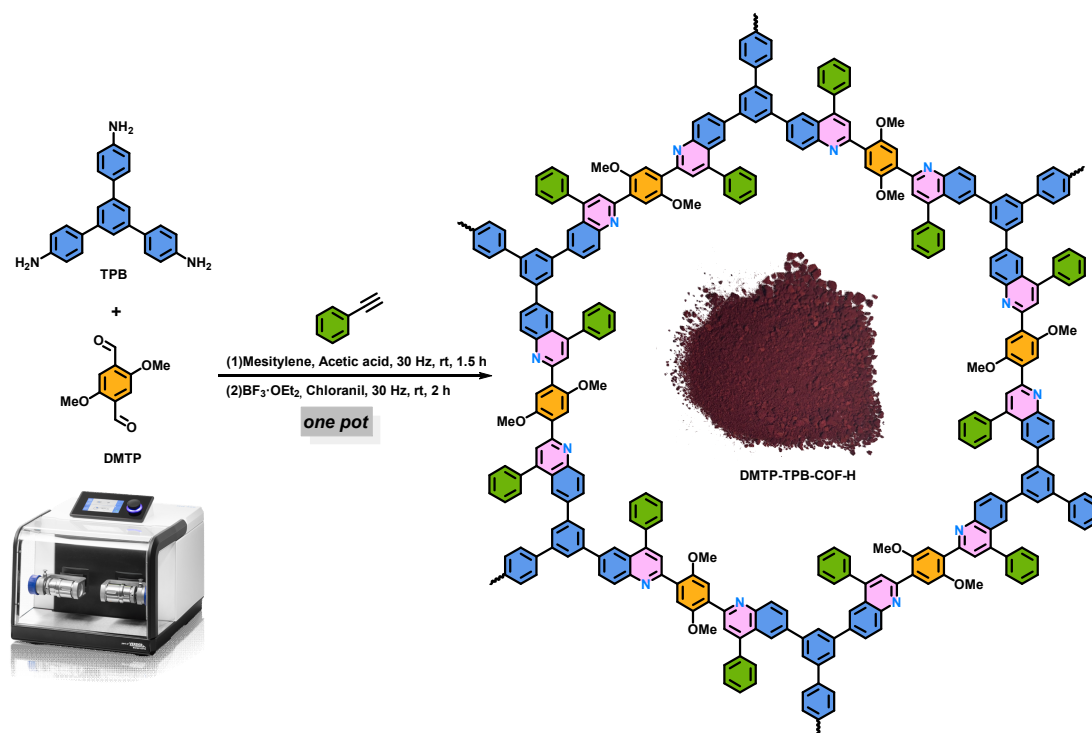

**Fig. S11.** Mechanochemical synthesis of DMTP-TPB-COF-H.

Into a 10 mL stainless steel milling jar, 1,3,5-tri(4-aminophenyl)benzene (TPB) (98.4 mg, 0.28 mmol), 2,5-dimethoxyterephthalaldehyde (DMTP) (81.6 mg, 0.42 mmol), mesitylene (160  $\mu\text{L}$ ), and glacial acetic acid (80  $\mu\text{L}$ ) were added along with four 4 mm steel balls. The reaction mixture was milled in a Retsch MM 400 Mixer Mill at 30 Hz for 1.5 h at room temperature. After that, phenylacetylene (92  $\mu\text{L}$ , 0.84 mmol),  $\text{BF}_3 \cdot \text{OEt}_2$  (41.5  $\mu\text{L}$ , 0.34 mmol), and chloranil (82.6 mg, 0.34 mmol) were added to the stainless steel milling jar, and the mixture was further milled at 30 Hz for 2 h at room temperature. The solid in the stainless steel milling jar was removed, immersed in N,N-dimethylformamide (DMF) in a small glass vial, and ultrasonically dispersed for 2 min. The sample was transferred to a suction funnel, washed first with N,N-dimethylformamide (DMF) and then with acetone until the filtrate was colorless. It was transferred to filter paper and purified by Soxhlet extraction (using tetrahydrofuran) for 24 h. The wet powder was dried at 110  $^\circ\text{C}$  under a high vacuum overnight to produce TPB-DMTP-COF-H in an isolated yield of 78.9 % (196.4 mg).

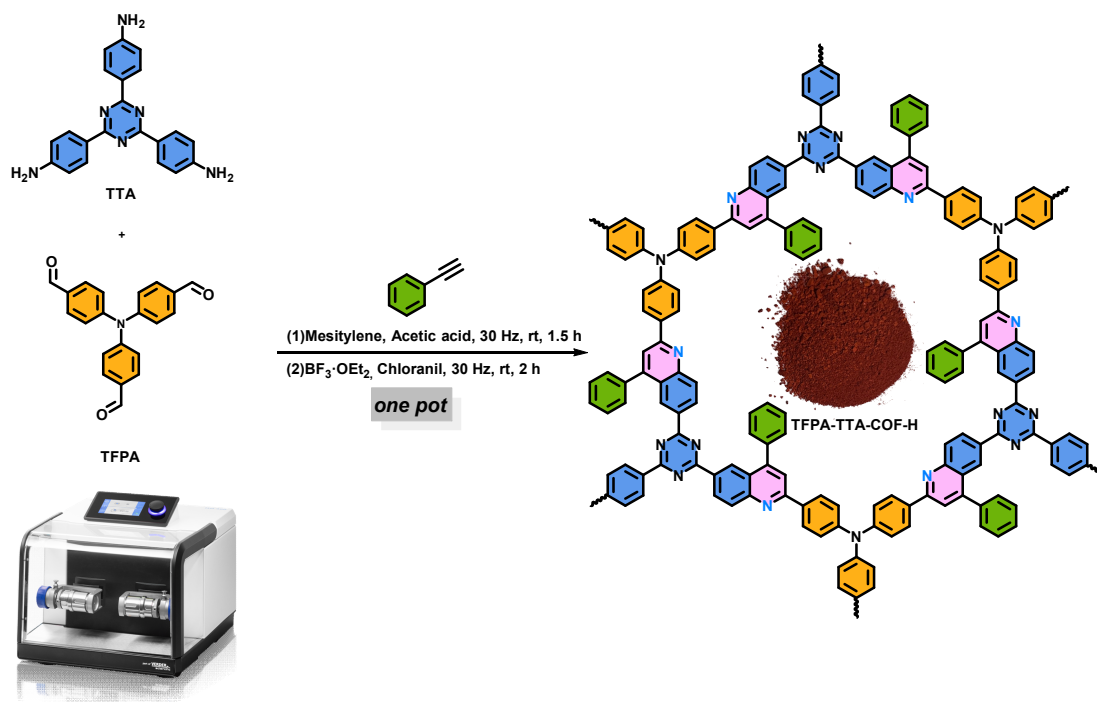

**Fig. S12.** Mechanochemical synthesis of TFPA-TTA-COF-H.

Into a 10 mL stainless steel milling jar, 4,4',4''-(1,3,5-triazine-2,4,6-triyl)trianiline (TTA) (99.2 mg, 0.28 mmol), tris (4-formylphenyl) amine (TFPA) (92.2 mg, 0.28 mmol), mesitylene (160  $\mu$ L), and glacial acetic acid (80  $\mu$ L) were added along with four 4 mm steel balls. The reaction mixture was milled in a Retsch MM 400 Mixer Mill at 30 Hz for 1.5 h at room temperature. After that, phenylacetylene (92  $\mu$ L, 0.84 mmol), BF<sub>3</sub>·OEt<sub>2</sub> (41.5  $\mu$ L, 0.34 mmol), and chloranil (82.6 mg, 0.34 mmol) were added to the stainless steel milling jar, and the mixture was further milled at 30 Hz for 2 h at room temperature. The solid in the stainless steel milling jar was removed, immersed in N,N-dimethylformamide (DMF) in a small glass vial, and ultrasonically dispersed for 2 min. The sample was transferred to a suction funnel, washed first with N,N-dimethylformamide (DMF) and then with acetone until the filtrate was colorless. It was transferred to filter paper and purified by Soxhlet extraction (using tetrahydrofuran) for 24 h. The wet powder was dried at 110 °C under a high vacuum overnight to produce TFPA-TTA-COF-H in an isolated yield of 68.6 % (178.1 mg).

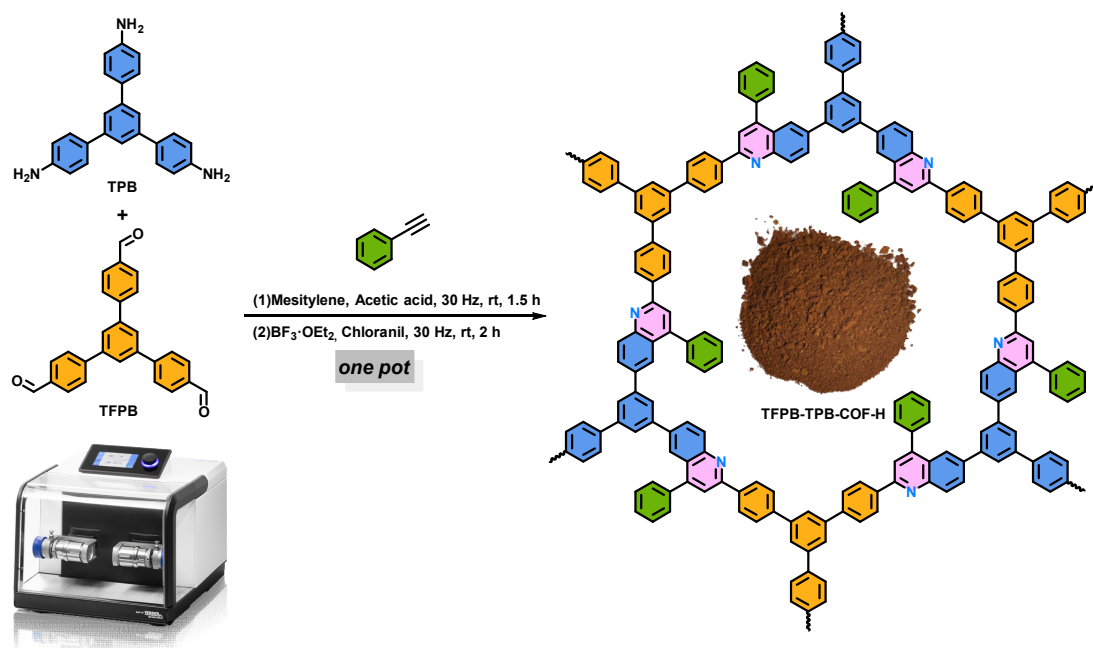

**Fig. S13.** Mechanochemical synthesis of TFPB-TPB-COF-H.

Into a 10 mL stainless steel milling jar, 1,3,5-tri(4-aminophenyl)benzene (TPB) (98.4 mg, 0.28 mmol), 1,3,5-tris(4-formylphenyl)benzene (TFPB) (109.3 mg, 0.28 mmol), mesitylene (160  $\mu\text{L}$ ), and glacial acetic acid (80  $\mu\text{L}$ ) were added along with four 4 mm steel balls. The reaction mixture was milled in a Retsch MM 400 Mixer Mill at 30 Hz for 1.5 h at room temperature. After that, phenylacetylene (92  $\mu\text{L}$ , 0.84 mmol),  $\text{BF}_3 \cdot \text{OEt}_2$  (41.5  $\mu\text{L}$ , 0.34 mmol), and chloranil (82.6 mg, 0.34 mmol) were added to the stainless steel milling jar, and the mixture was further milled at 30 Hz for 2 h at room temperature. The solid in the stainless steel milling jar was removed, immersed in *N,N*-dimethylformamide (DMF) in a small glass vial, and ultrasonically dispersed for 2 min. The sample was transferred to a suction funnel, washed first with *N,N*-dimethylformamide (DMF) and then with acetone until the filtrate was colorless. It was transferred to filter paper and purified by Soxhlet extraction (using tetrahydrofuran) for 24 h. The wet powder was dried at 110  $^\circ\text{C}$  under a high vacuum overnight to produce TFPB-TPB-COF-H in an isolated yield of 80.4 % (222.5 mg).

Into a 50 mL stainless steel milling jar, amine monomer (1.68 mmol), aldehyde monomer (1.68 mmol), mesitylene (960  $\mu$ L), and glacial acetic acid (480  $\mu$ L) were added along with four 4 mm steel balls. The reaction mixture was milled in a Retsch MM 400 Mixer Mill at 30 Hz for 1.5 h at room temperature. After that, aryl alkyne monomer (5.04 mmol),  $\text{BF}_3 \cdot \text{OEt}_2$  (264  $\mu$ L, 2.01 mmol), and chloranil (495.6 mg, 2.01 mmol) were added to the stainless steel milling jar, and the mixture was further milled at 30 Hz for 2 h at room temperature. The solid in the stainless steel milling jar was removed, immersed in N,N-dimethylformamide (DMF) in a small glass vial, and ultrasonically dispersed for 2 min. The sample was transferred to a suction funnel, washed first with N,N-dimethylformamide (DMF) and then with acetone until the filtrate was colorless. It was transferred to filter paper and purified by Soxhlet extraction (using tetrahydrofuran) for 24 h. The wet powder was dried at 110  $^\circ\text{C}$  under a high vacuum overnight to produce the target products.

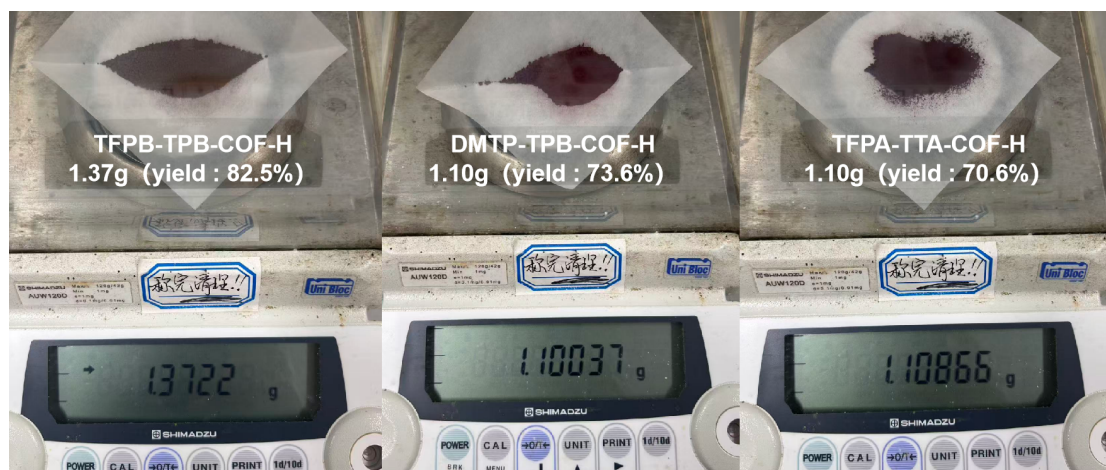

**Fig. S14.** Gram-Scale Preparation of Quinoline-linked COFs.

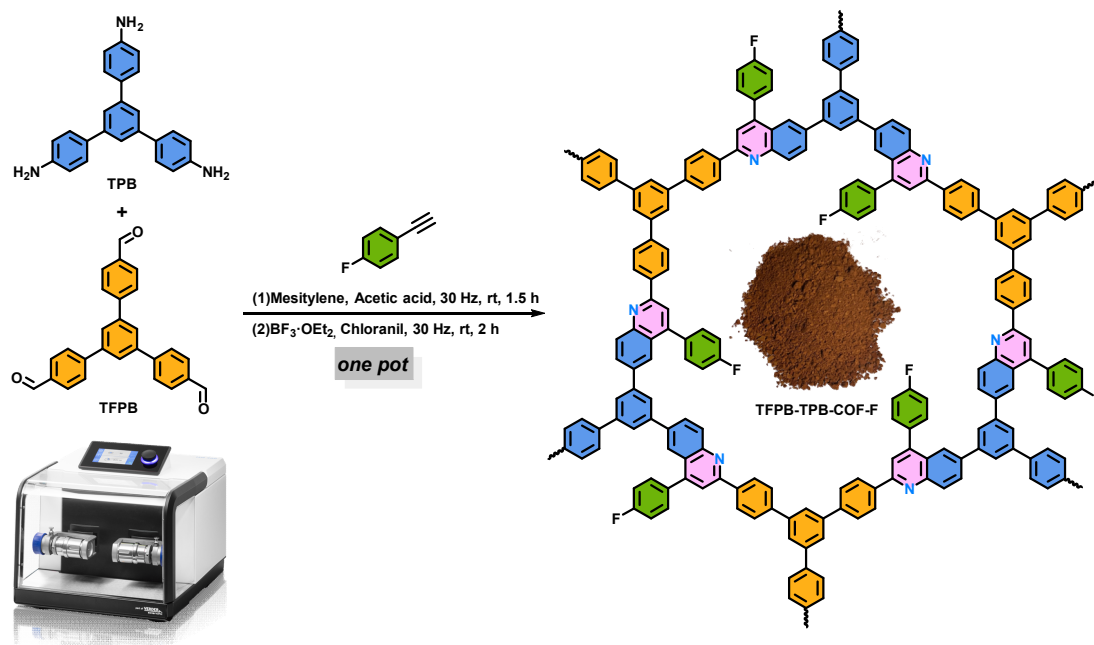

**Fig. S15.** Mechanochemical synthesis of TFPB-TPB-COF-F.

Into a 10 mL stainless steel milling jar, 1,3,5-tri(4-aminophenyl)benzene (TPB) (98.4 mg, 0.28 mmol), 1,3,5-tris(4-formylphenyl)benzene (TFPB) (109.3 mg, 0.28 mmol), mesitylene (160  $\mu\text{L}$ ), and glacial acetic acid (80  $\mu\text{L}$ ) were added along with four 4 mm steel balls. The reaction mixture was milled in a Retsch MM 400 Mixer Mill at 30 Hz for 1.5 h at room temperature. After that, 4-fluorophenylacetylene (96  $\mu\text{L}$ , 0.84 mmol),  $\text{BF}_3 \cdot \text{OEt}_2$  (41.5  $\mu\text{L}$ , 0.34 mmol), and chloranil (82.6 mg, 0.34 mmol) were added to the stainless steel milling jar, and the mixture was further milled at 30 Hz for 2 h at room temperature. The solid in the stainless steel milling jar was removed, immersed in *N,N*-dimethylformamide (DMF) in a small glass vial, and ultrasonically dispersed for 2 min. The sample was transferred to a suction funnel, washed first with *N,N*-dimethylformamide (DMF) and then with acetone until the filtrate was colorless. It was transferred to filter paper and purified by Soxhlet extraction (using tetrahydrofuran) for 24 h. The wet powder was dried at 110  $^\circ\text{C}$  under a high vacuum overnight to produce TFPB-TPB-COF-F in an isolated yield of 76.1 % (222.0 mg).

### **Solvothermal Preparation of TFPB-TPB-COF-F**

To a 25 mL Pyrex glass tube, TFPB-TPB-COF-F (50 mg), styrene (75  $\mu$ L),  $\text{BF}_3 \cdot \text{OEt}_2$  (25  $\mu$ L), chloranil (50 mg) and toluene (10 mL) were added. The glass tube was sonicated for 10 minutes, rapidly frozen at 77 K (in a liquid nitrogen bath), and degassed through three consecutive freeze-pump-thaw cycles. After reducing the internal pressure to  $10^{-3}$  bar, the glass tube was flame-sealed and then placed in an oven preheated to 120  $^{\circ}\text{C}$  for a 72 h reaction. Upon the completion of the reaction, the sample was transferred to a Buchner funnel, washed sequentially with N,N-dimethylformamide (DMF) and acetone until the filtrate turned colorless. The solid product was transferred onto filter paper and purified by Soxhlet extraction using tetrahydrofuran as the extractant for 24 h. Finally, the wet powder was dried overnight at 110  $^{\circ}\text{C}$  under high vacuum conditions, affording the target product TFPB-TPB-COF-F (solvothermal) with a yield of 54.6 mg.

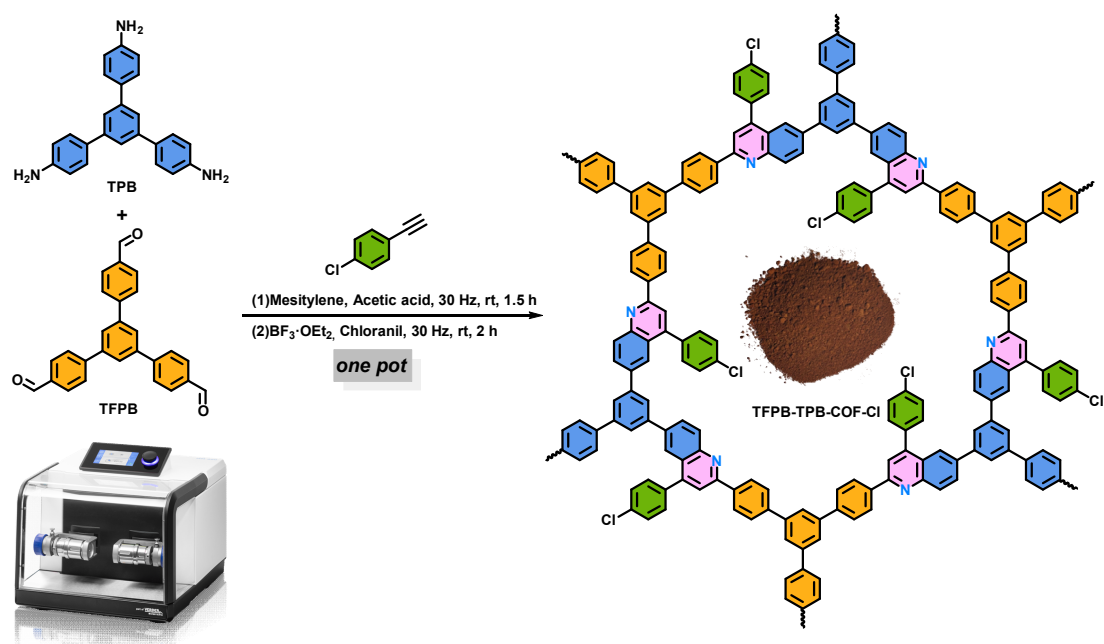

**Fig. S16.** Mechanochemical synthesis of TFPB-TPB-COF-Cl.

Into a 10 mL stainless steel milling jar, 1,3,5-tri(4-aminophenyl)benzene (TPB) (98.4 mg, 0.28 mmol), 1,3,5-tris(4-formylphenyl)benzene (TFPB) (109.3 mg, 0.28 mmol), mesitylene (160  $\mu$ L), and glacial acetic acid (80  $\mu$ L) were added along with four 4 mm steel balls. The reaction mixture was milled in a Retsch MM 400 Mixer Mill at 30 Hz for 1.5 h at room temperature. After that, 4-chlorophenylacetylene (114.7 mg, 0.84 mmol),  $\text{BF}_3 \cdot \text{OEt}_2$  (41.5  $\mu$ L, 0.34 mmol), and chloranil (82.6 mg, 0.34 mmol) were added to the stainless steel milling jar, and the mixture was further milled at 30 Hz for 2 h at room temperature. The solid in the stainless steel milling jar was removed, immersed in N,N-dimethylformamide (DMF) in a small glass vial, and ultrasonically dispersed for 2 min. The sample was transferred to a suction funnel, washed first with N,N-dimethylformamide (DMF) and then with acetone until the filtrate was colorless. It was transferred to filter paper and purified by Soxhlet extraction (using tetrahydrofuran) for 24 h. The wet powder was dried at 110  $^\circ\text{C}$  under a high vacuum overnight to produce TFPB-TPB-COF-Cl in an isolated yield of 72.9 % (222.9 mg).

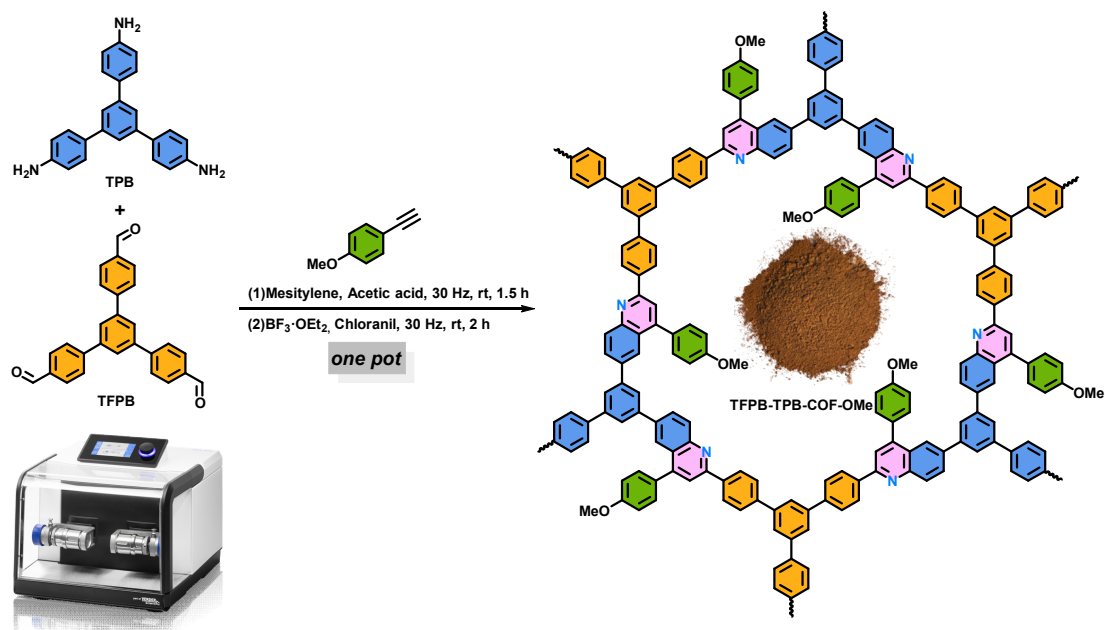

**Fig. S17.** Mechanochemical synthesis of TFPB-TPB-COF-OMe.

Into a 10 mL stainless steel milling jar, 1,3,5-tri(4-aminophenyl)benzene (TPB) (98.4 mg, 0.28 mmol), 1,3,5-tris(4-formylphenyl)benzene (TFPB) (109.3 mg, 0.28 mmol), mesitylene (160  $\mu$ L), and glacial acetic acid (80  $\mu$ L) were added along with four 4 mm steel balls. The reaction mixture was milled in a Retsch MM 400 Mixer Mill at 30 Hz for 1.5 h at room temperature. After that, 4-ethynylanisole (109  $\mu$ L, 0.84 mmol), BF<sub>3</sub>·OEt<sub>2</sub> (41.5  $\mu$ L, 0.34 mmol), and chloranil (82.6 mg, 0.34 mmol) were added to the stainless steel milling jar, and the mixture was further milled at 30 Hz for 2 h at room temperature. The solid in the stainless steel milling jar was removed, immersed in N,N-dimethylformamide (DMF) in a small glass vial, and ultrasonically dispersed for 2 min. The sample was transferred to a suction funnel, washed first with N,N-dimethylformamide (DMF) and then with acetone until the filtrate was colorless. It was transferred to filter paper and purified by Soxhlet extraction (using tetrahydrofuran) for 24 h. The wet powder was dried at 110  $^{\circ}$ C under a high vacuum overnight to produce TFPB-TPB-COF-OMe in an isolated yield of 89.7 % (270.8 mg).

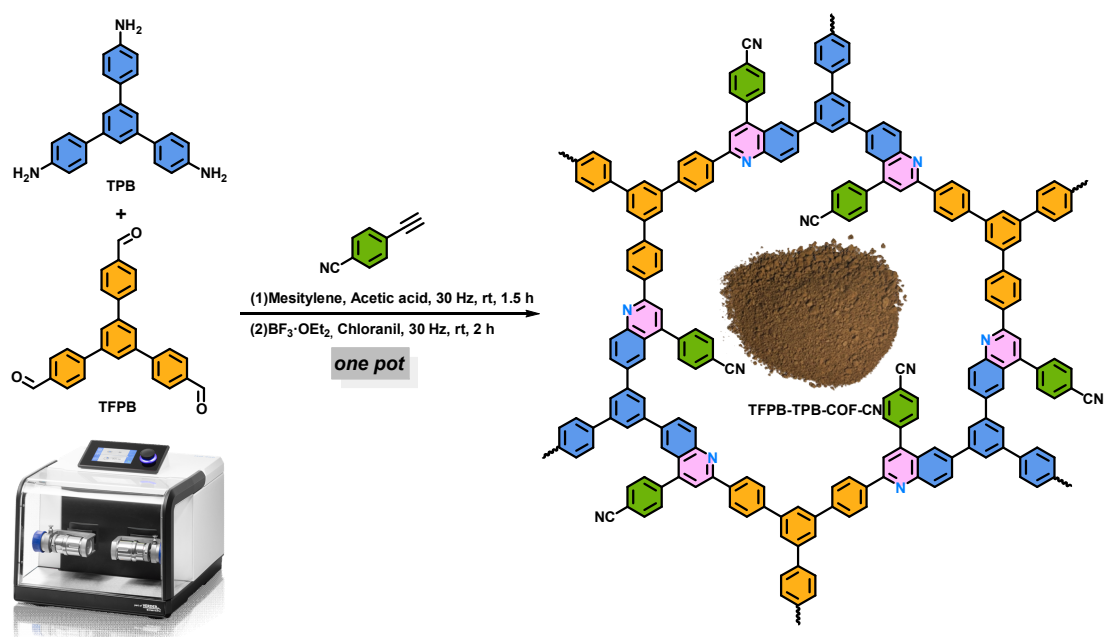

**Fig. S18.** Mechanochemical synthesis of TFPB-TPB-COF-CN.

Into a 10 mL stainless steel milling jar, 1,3,5-tri(4-aminophenyl)benzene (TPB) (98.4 mg, 0.28 mmol), 1,3,5-tris(4-formylphenyl)benzene (TFPB) (109.3 mg, 0.28 mmol), mesitylene (160  $\mu$ L), and glacial acetic acid (80  $\mu$ L) were added along with four 4 mm steel balls. The reaction mixture was milled in a Retsch MM 400 Mixer Mill at 30 Hz for 1.5 h at room temperature. After that, 4-cyanophenylacetylene (106.8 mg, 0.84 mmol),  $\text{BF}_3 \cdot \text{OEt}_2$  (41.5  $\mu$ L, 0.34 mmol), and chloranil (82.6 mg, 0.34 mmol) were added to the stainless steel milling jar, and the mixture was further milled at 30 Hz for 2 h at room temperature. The solid in the stainless steel milling jar was removed, immersed in N,N-dimethylformamide (DMF) in a small glass vial, and ultrasonically dispersed for 2 min. The sample was transferred to a suction funnel, washed first with N,N-dimethylformamide (DMF) and then with acetone until the filtrate was colorless. It was transferred to filter paper and purified by Soxhlet extraction (using tetrahydrofuran) for 24 h. The wet powder was dried at 110  $^\circ\text{C}$  under a high vacuum overnight to produce TFPB-TPB-COF-CN in an isolated yield of 72.8% (216.8 mg).

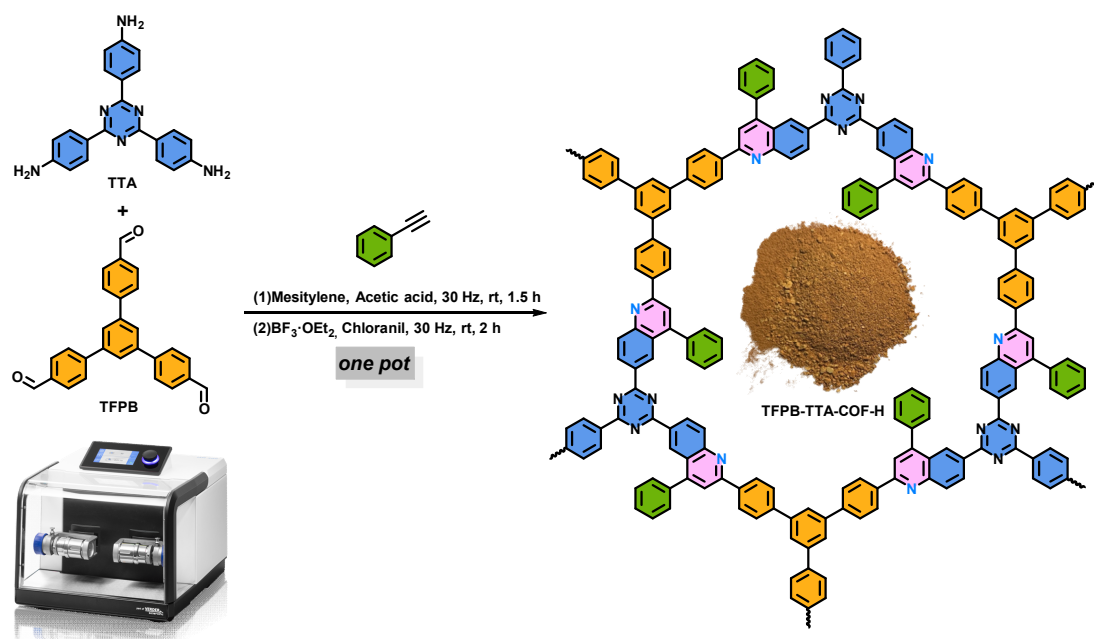

**Fig. S19.** Mechanochemical synthesis of TFPB-TTA-COF-H.

Into a 10 mL stainless steel milling jar, 4,4',4''-(1,3,5-triazine-2,4,6-triyl)trianiline (TTA) (99.2 mg, 0.28 mmol), 1,3,5-tris(4-formylphenyl)benzene (TFPB) (109.3 mg, 0.28 mmol), mesitylene (160  $\mu$ L), and glacial acetic acid (80  $\mu$ L) were added along with four 4 mm steel balls. The reaction mixture was milled in a Retsch MM 400 Mixer Mill at 30 Hz for 1.5 h at room temperature. After that, phenylacetylene (92  $\mu$ L, 0.84 mmol), BF<sub>3</sub>·OEt<sub>2</sub> (41.5  $\mu$ L, 0.34 mmol), and chloranil (82.6 mg, 0.34 mmol) were added to the stainless steel milling jar, and the mixture was further milled at 30 Hz for 2 h at room temperature. The solid in the stainless steel milling jar was removed, immersed in N,N-dimethylformamide (DMF) in a small glass vial, and ultrasonically dispersed for 2 min. The sample was transferred to a suction funnel, washed first with N,N-dimethylformamide (DMF) and then with acetone until the filtrate was colorless. It was transferred to filter paper and purified by Soxhlet extraction (using tetrahydrofuran) for 24 h. The wet powder was dried at 110  $^{\circ}$ C under a high vacuum overnight to produce TFPB-TTA-COF-H in an isolated yield of 68.1 % (176.7 mg).

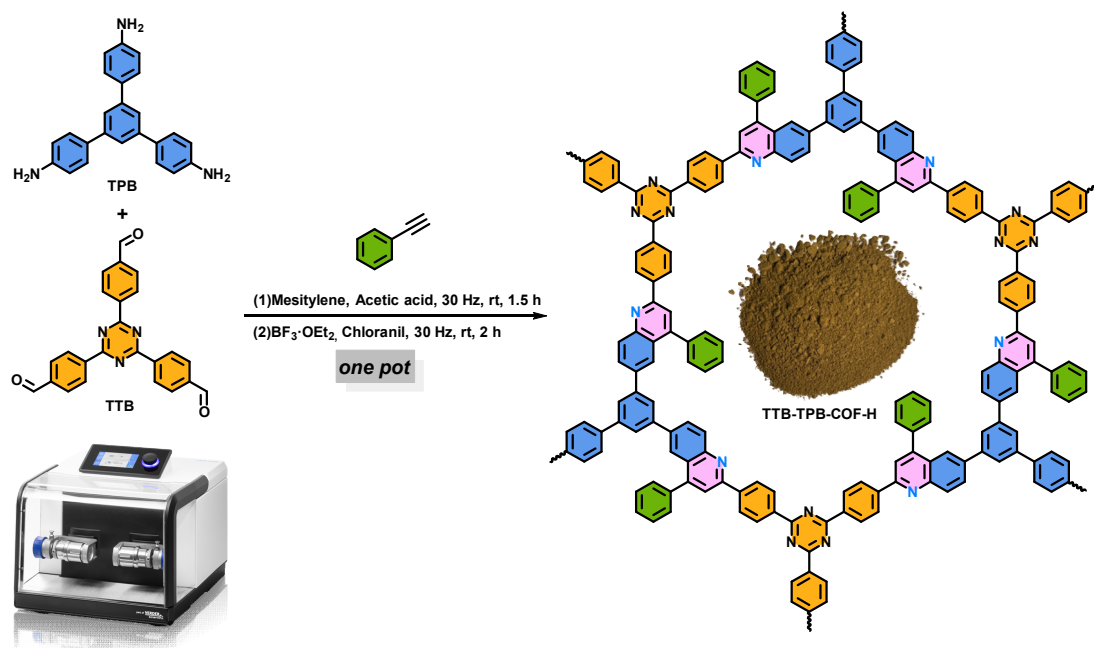

**Fig. S20.** Mechanochemical synthesis of TTB-TPB-COF-H.

Into a 10 mL stainless steel milling jar, 1,3,5-tri(4-aminophenyl)benzene (TPB) (98.4 mg, 0.28 mmol), 4,4',4''-(1,3,5-triazine-2,4,6-triyl) tribenzaldehyde (TTB) (110.1 mg, 0.28 mmol), mesitylene (160  $\mu$ L), and glacial acetic acid (80  $\mu$ L) were added along with four 4 mm steel balls. The reaction mixture was milled in a Retsch MM 400 Mixer Mill at 30 Hz for 1.5 h at room temperature. After that, phenylacetylene (92  $\mu$ L, 0.84 mmol), BF<sub>3</sub>·OEt<sub>2</sub> (41.5  $\mu$ L, 0.34 mmol), and chloranil (82.6 mg, 0.34 mmol) were added to the stainless steel milling jar, and the mixture was further milled at 30 Hz for 2 h at room temperature. The solid in the stainless steel milling jar was removed, immersed in N,N-dimethylformamide (DMF) in a small glass vial, and ultrasonically dispersed for 2 min. The sample was transferred to a suction funnel, washed first with N,N-dimethylformamide (DMF) and then with acetone until the filtrate was colorless. It was transferred to filter paper and purified by Soxhlet extraction (using tetrahydrofuran) for 24 h. The wet powder was dried at 110 °C under a high vacuum overnight to produce TTB-TPB-COF-H in an isolated yield of 92.2 % (255.9 mg).

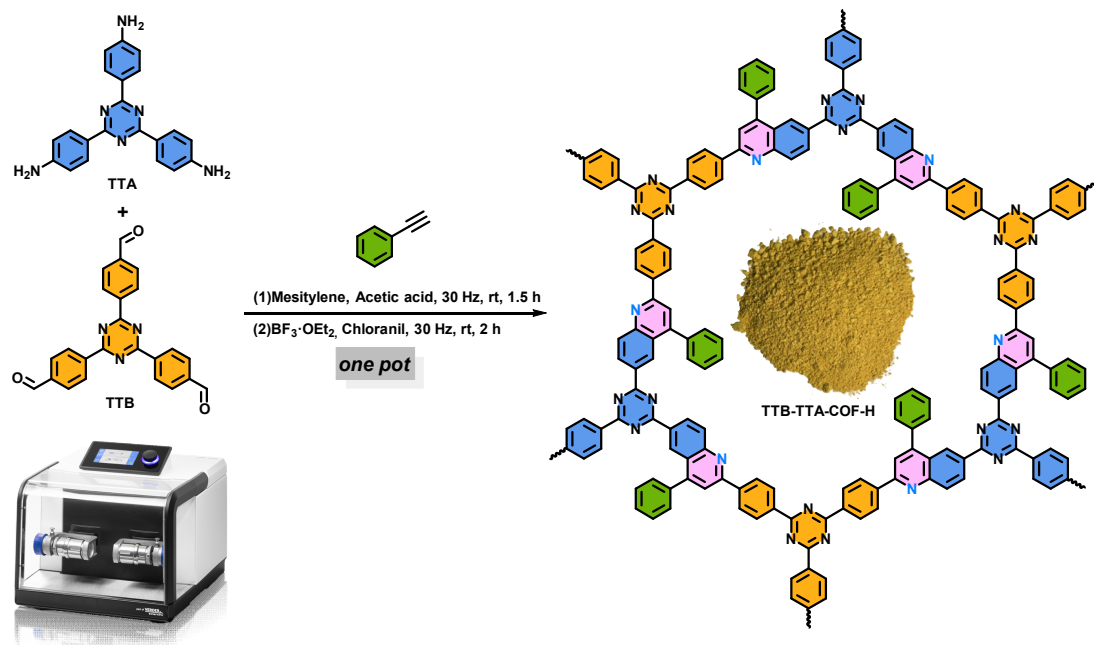

**Fig. S21.** Mechanochemical synthesis of TTB-TTA-COF-H.

Into a 10 mL stainless steel milling jar, 4,4',4''-(1,3,5-triazine-2,4,6-triyl)trianiline (TTA) (99.2 mg, 0.28 mmol), 4,4',4''-(1,3,5-triazine-2,4,6-triyl) tribenzaldehyde (TTB) (110.1 mg, 0.28 mmol), mesitylene (160  $\mu$ L), and glacial acetic acid (80  $\mu$ L) were added along with four 4 mm steel balls. The reaction mixture was milled in a Retsch MM 400 Mixer Mill at 30 Hz for 1.5 h at room temperature. After that, phenylacetylene (92  $\mu$ L, 0.84 mmol),  $\text{BF}_3 \cdot \text{OEt}_2$  (41.5  $\mu$ L, 0.34 mmol), and chloranil (82.6 mg, 0.34 mmol) were added to the stainless steel milling jar, and the mixture was further milled at 30 Hz for 2 h at room temperature. The solid in the stainless steel milling jar was removed, immersed in N,N-dimethylformamide (DMF) in a small glass vial, and ultrasonically dispersed for 2 min. The sample was transferred to a suction funnel, washed first with N,N-dimethylformamide (DMF) and then with acetone until the filtrate was colorless. It was transferred to filter paper and purified by Soxhlet extraction (using tetrahydrofuran) for 24 h. The wet powder was dried at 110  $^\circ\text{C}$  under a high vacuum overnight to produce TTB-TTA-COF-H in an isolated yield of 90.5 % (251.3 mg).

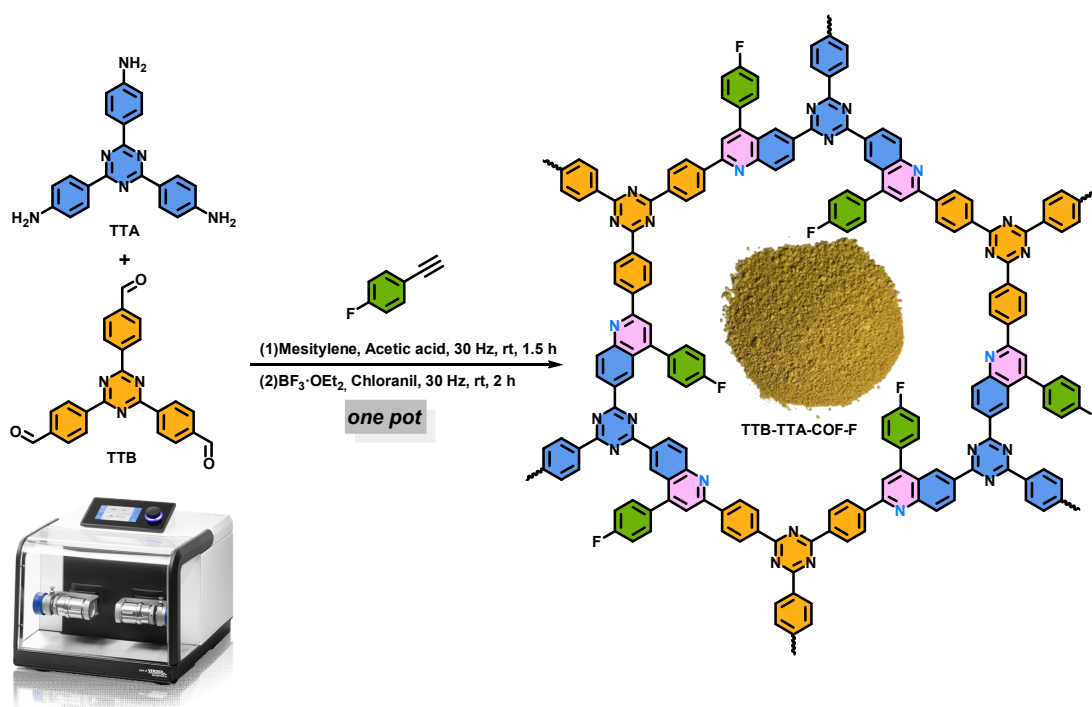

**Fig. S22.** Mechanochemical synthesis of TTB-TTA-COF-F.

Into a 10 mL stainless steel milling jar, 4,4',4''-(1,3,5-triazine-2,4,6-triyl)trianiline (TTA) (99.2 mg, 0.28 mmol), 4,4',4''-(1,3,5-triazine-2,4,6-triyl) tribenzaldehyde (TTB) (110.1 mg, 0.28 mmol), mesitylene (160  $\mu$ L), and glacial acetic acid (80  $\mu$ L) were added along with four 4 mm steel balls. The reaction mixture was milled in a Retsch MM 400 Mixer Mill at 30 Hz for 1.5 h at room temperature. After that, 4-fluorophenylacetylene (96  $\mu$ L, 0.84 mmol), BF<sub>3</sub>·OEt<sub>2</sub> (41.5  $\mu$ L, 0.34 mmol), and chloranil (82.6 mg, 0.34 mmol) were added to the stainless steel milling jar, and the mixture was further milled at 30 Hz for 2 h at room temperature. The solid in the stainless steel milling jar was removed, immersed in N,N-dimethylformamide (DMF) in a small glass vial, and ultrasonically dispersed for 2 min. The sample was transferred to a suction funnel, washed first with N,N-dimethylformamide (DMF) and then with acetone until the filtrate was colorless. It was transferred to filter paper and purified by Soxhlet extraction (using tetrahydrofuran) for 24 h. The wet powder was dried at 110 °C under a high vacuum overnight to produce TTB-TTA-COF-F in an isolated yield of 87.6 % (256.3 mg).

## Characterizations of COF Materials

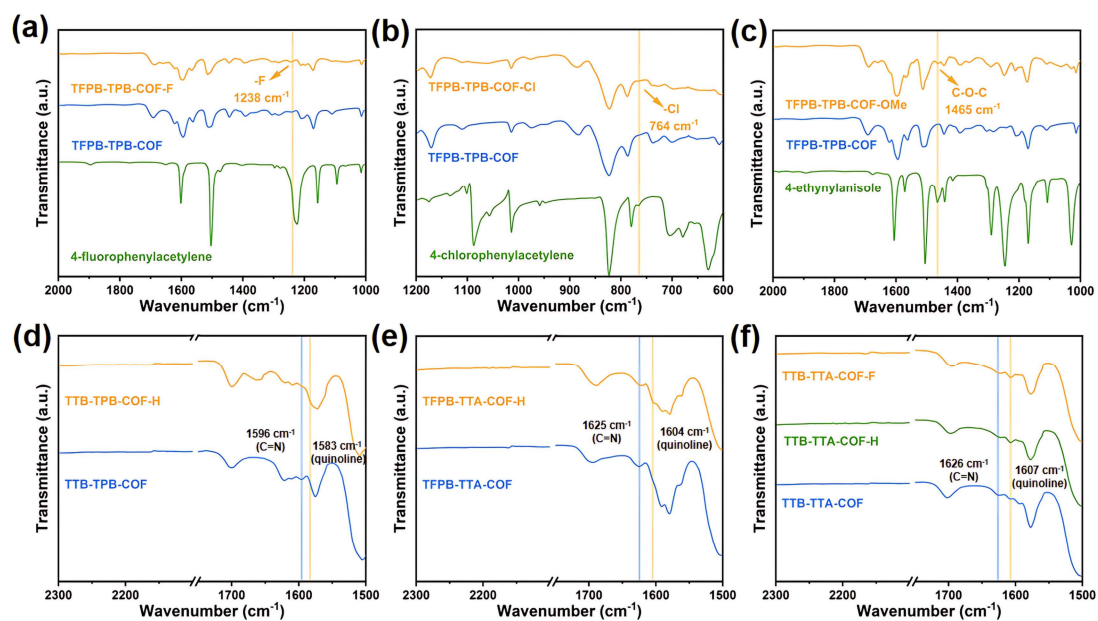

**Fig. S23.** FT-IR spectra of a) TTB-TPB-COF, b) TFPB-TTA-COF and c) TTB-TTA-COF and there corresponding monomers. FT-IR spectra of d) TTB-TPB-COF, e) TFPB-TTA-COF and f) TTB-TTA-COF before and after imine-to-quinoline conversion.

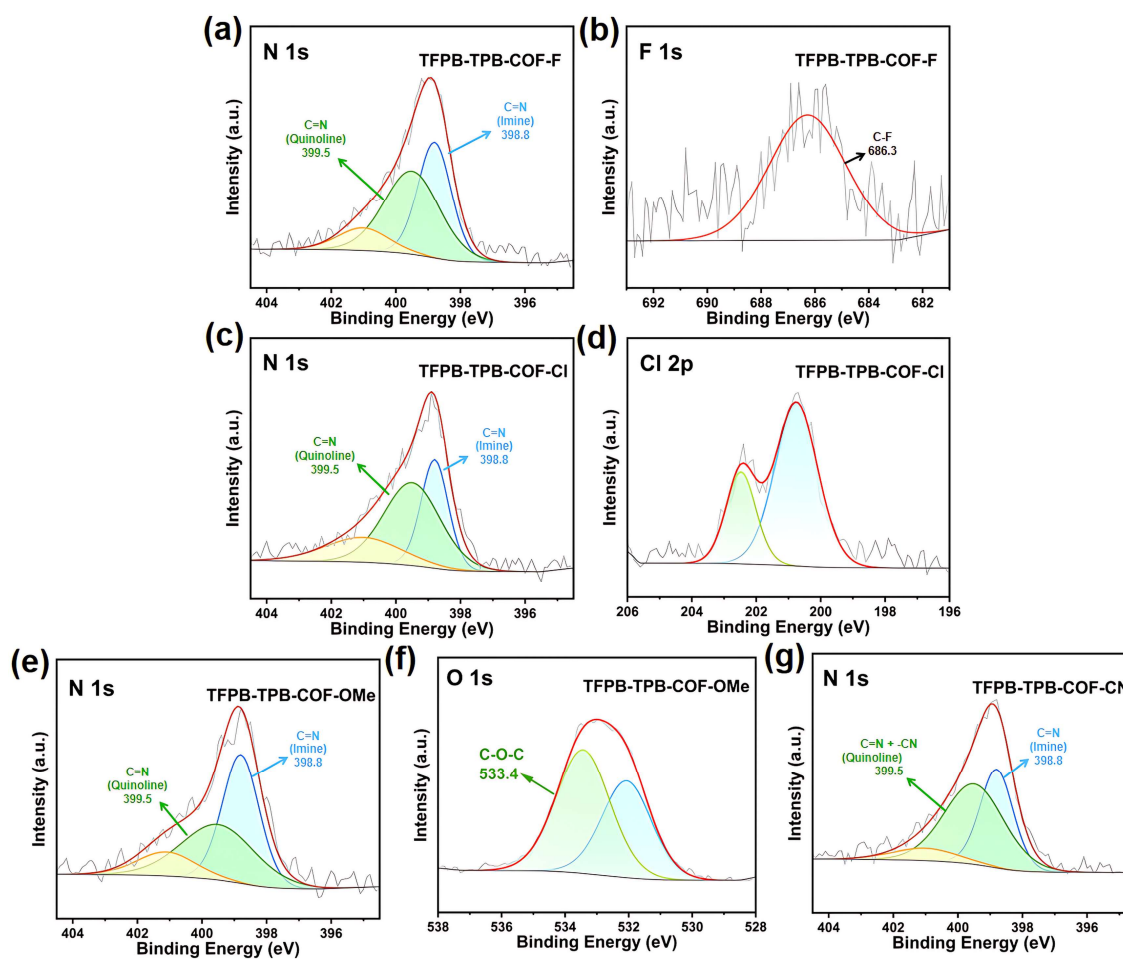

**Fig. S24.**High resolution N 1s XPS spectra of a) TFPB-TPB-COF-F, c) TFPB-TPB-COF-Cl, e) TFPB-TPB-COF-OMe, g) TFPB-TPB-COF-CN. F 1s XPS spectrum of b) TFPB-TPB-COF-F. Cl 2p deconvolution spectra of d) TFPB-TPB-COF-Cl. O 1s XPS spectrum of f) TFPB-TPB-COF-OMe. Note: The N1s peak centered at 401 eV is assigned to the unreacted  $\text{-NH}_2$  at the defective edges of COF (yellow area).

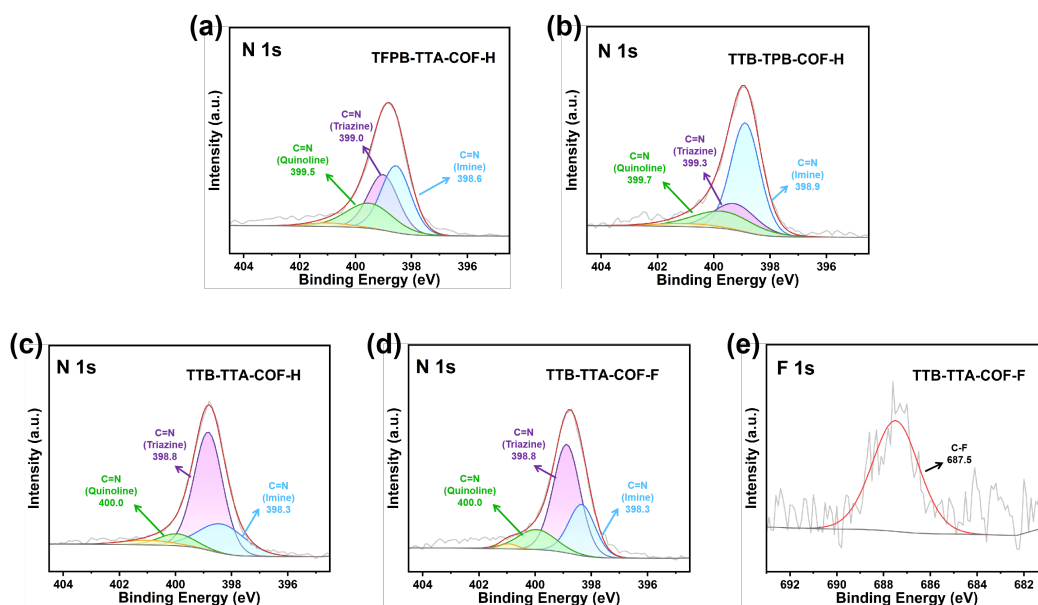

**Fig. S25.** The high resolution XPS N 1s deconvolution spectra of a) TFPB-TTA-COF-H, b) TTB-TPB-COF-H, c) TTB-TTA-COF-H and d) TTB-TTA-COF-F. F 1s XPS spectrum of e) TTB-TTA-COF-F containing pentafluoro benzene. Note: The N1s peak centered at 401 eV is assigned to the unreacted  $\text{-NH}_2$  at the defective edges of COF.

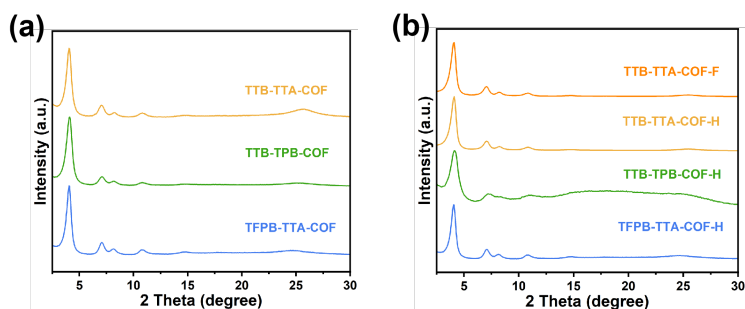

**Fig. S26.** a) PXRD patterns of TFPB-TTA-COF (blue), TTB-TPB-COF (green) and TTB-TTA-COF (yellow). b) PXRD patterns of TFPB-TTA-COF-H (blue), TTB-TPB-COF-H (green), TTB-TTA-COF-H (yellow) and TTB-TTA-COF-F (orange).

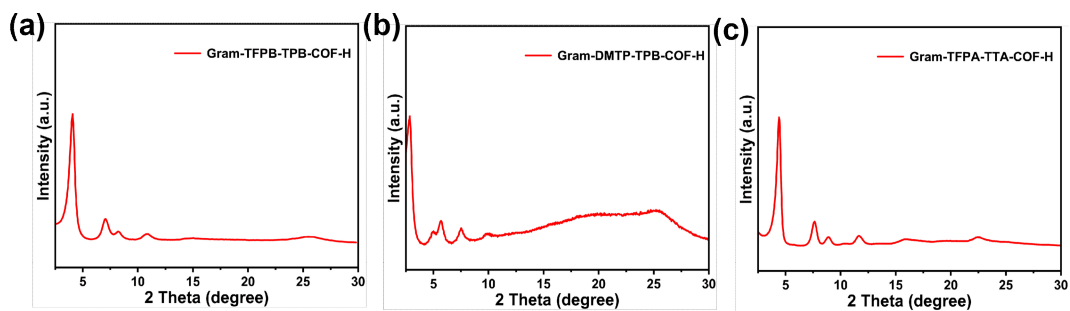

**Fig. S27.** PXRD patterns of a) Gram-TFPB-TPB-COF-H, b) Gram-DMTP-TPB-COF-H and c) Gram-TFPA-TTA-COF-H Prepared via Gram-Scale Synthesis.

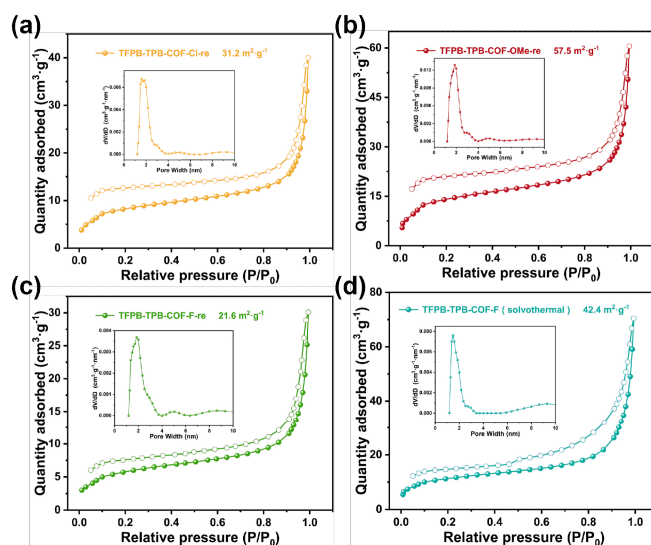

**Fig. S28.** N<sub>2</sub> adsorption-desorption isotherms and corresponding pore-size distributions of a) TFPB-TPB-COF-Cl-re, b) TFPB-TPB-COF-OMe-re, c) TFPB-TPB-COF-F-re and d) TFPB-TPB-COF-F (solvothermal).

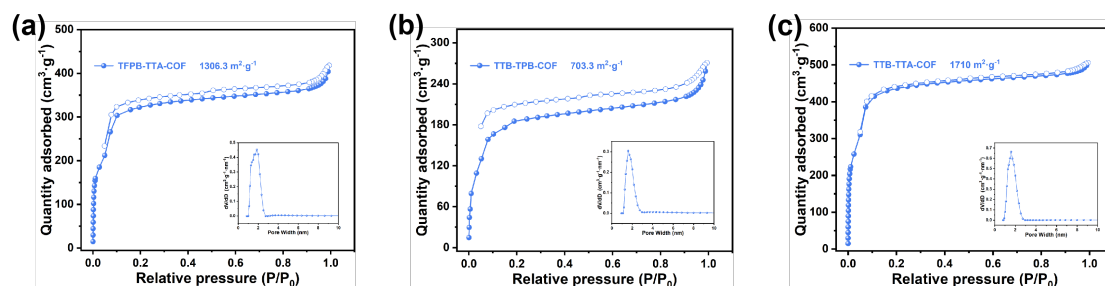

**Fig. S29.** N<sub>2</sub> adsorption-desorption isotherms and corresponding pore-size distributions of a) TFPB-TTA-COF, b) TTB-TPB-COF and c) TTB-TTA-COF.

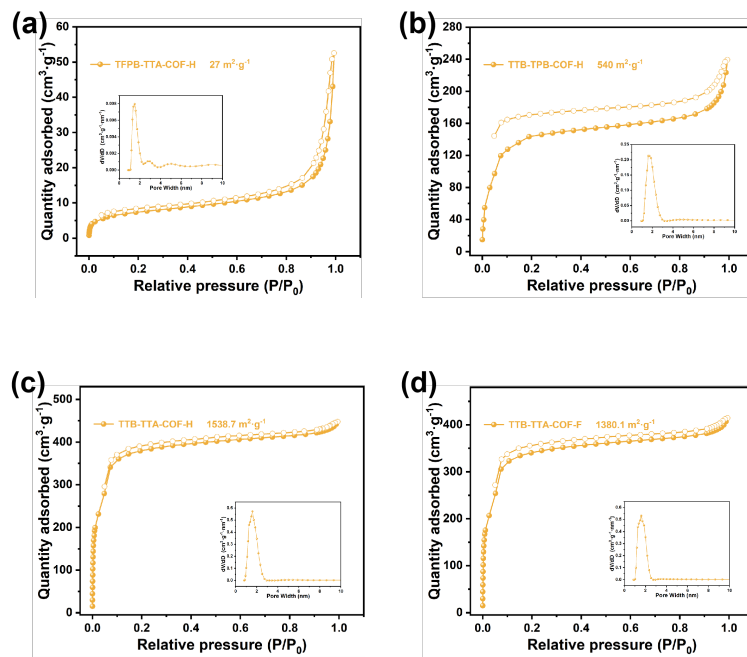

**Fig. S30.**  $N_2$  adsorption-desorption isotherms and corresponding pore-size distributions of a) TFPB-TTA-COF-H, b) TTB-TPB-COF-H, c) TTB-TTA-COF-H and d) TTB-TTA-COF-F.

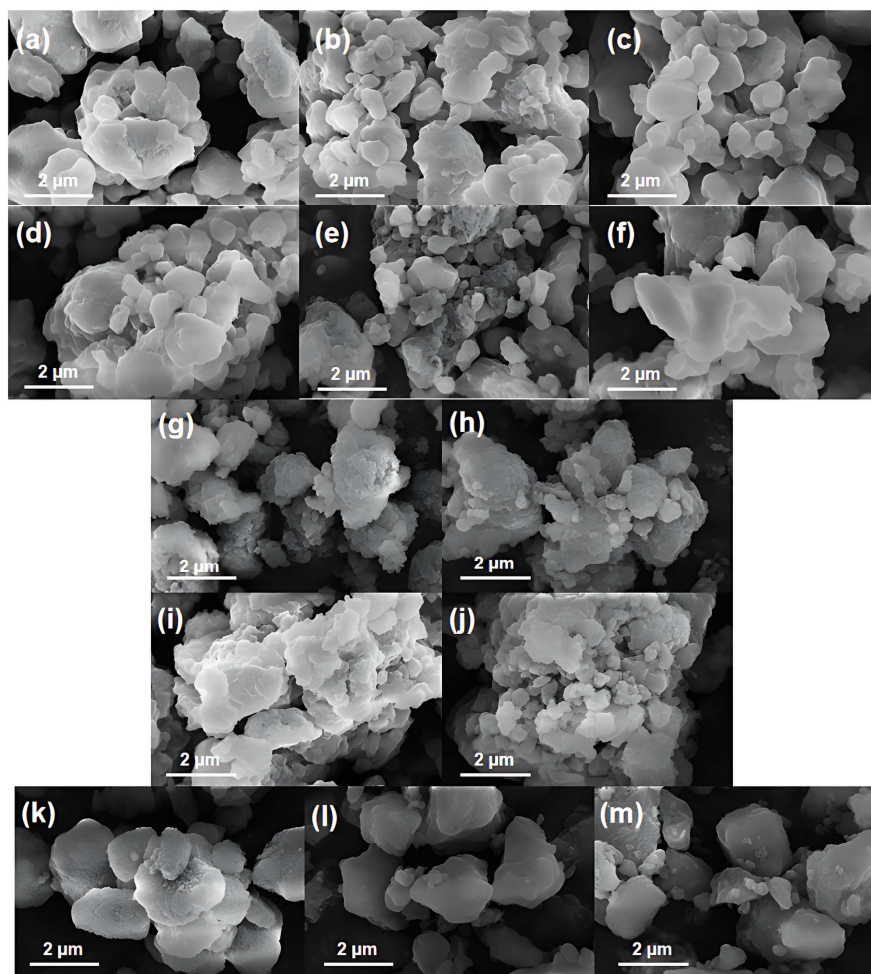

**Fig. S31.** SEM images of a) TFPB-TPB-COF, b) TFPB-TPB-COF-H, c) TFPB-TPB-COF-F, d) TFPB-TPB-COF-Cl, e) TFPB-TPB-COF-Ome, f) TFPB-TPB-COF-CN, g) TFPB-TTA-COF, h) TFPB-TTA-COF-H, i) TTB-TPB-COF, j) TTB-TPB-COF-H, k) TTB-TTA-COF, l) TTB-TTA-COF-H and m) TTB-TTA-COF-F.

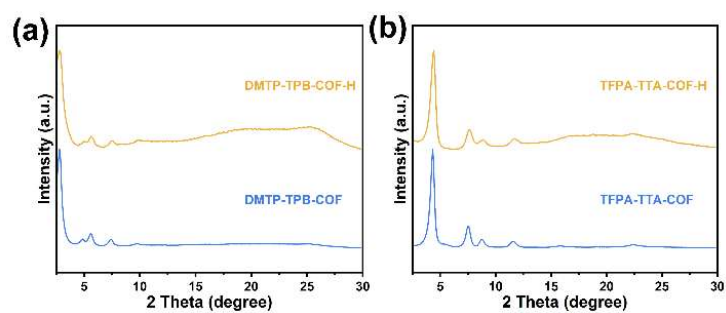

**Fig. S32.** a) PXRD patterns of DMTP-TPB-COF and DMTP-TPB-COF-H. b) PXRD patterns of TFPA-TTA-COF and TFPA-TTA-COF-H.

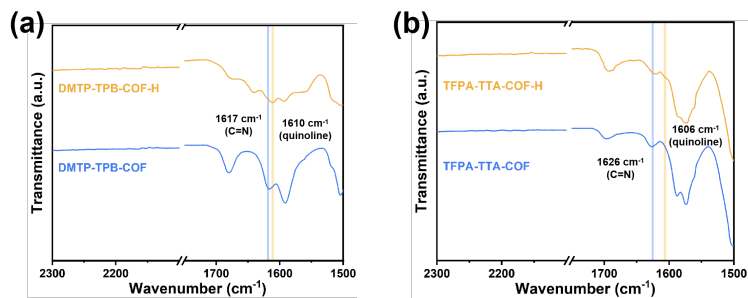

**Fig. S33.** FT-IR spectra of a) DMTP-TPB-COF, and c) TFPA-TTA-COF before and after imine-to-quinoline conversion.

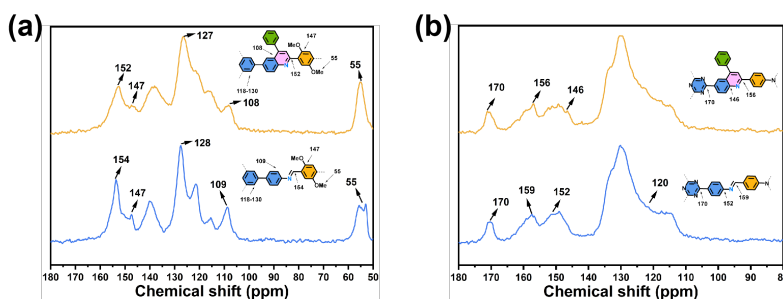

**Fig. S34.** The blue line represents the solid-state <sup>13</sup>C nuclear magnetic resonance (NMR) spectrum of DMTP-TPB-COF, and the yellow line represents the solid-state <sup>13</sup>C NMR spectrum of DMTP-TPB-COF-H. b) The blue line represents the solid-state <sup>13</sup>C NMR spectrum of TFPA-TTA-COF, and the yellow line represents the solid-state <sup>13</sup>C NMR spectrum of TFPA-TTA-COF-H.

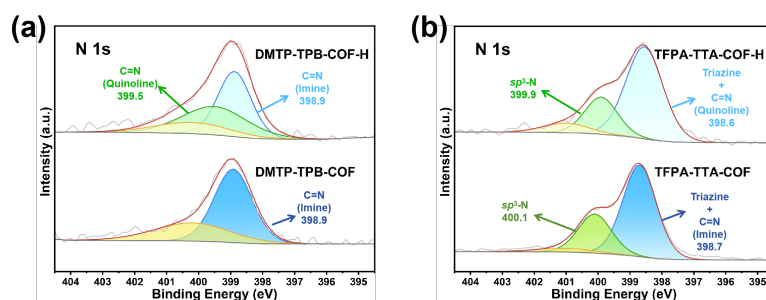

**Fig. S35.** The high resolution XPS N 1s deconvolution spectra of a) DMTP-TTA-COF and b) TFPA-TPB-COF before and after imine-to-quinoline conversion.

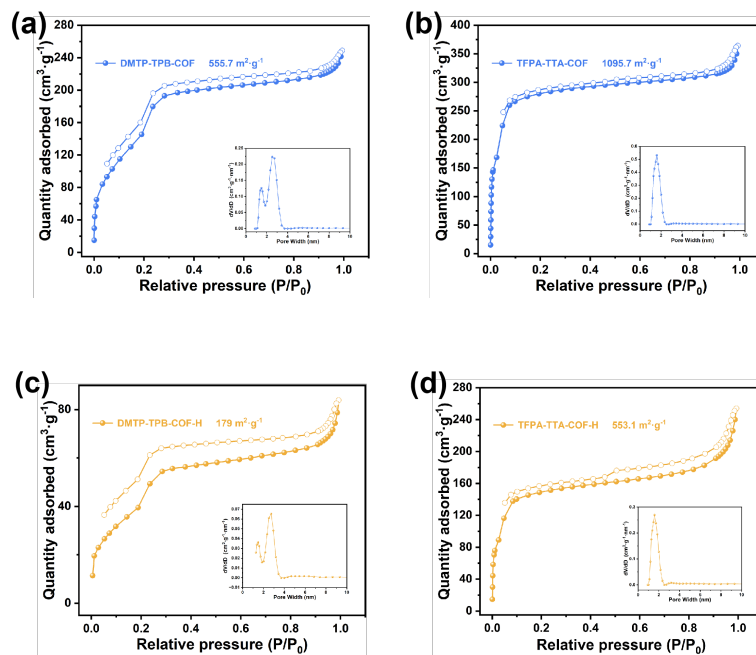

**Fig. S36.** N<sub>2</sub> adsorption-desorption isotherms and corresponding pore-size distributions of a) DMTP-TPB-COF, b) TFPA-TTA-COF, c) DMTP-TPB-COF-H and d) TFPA-TTA-COF-H.

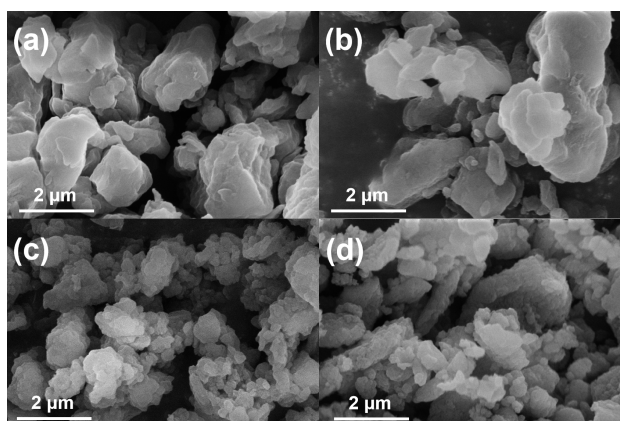

**Fig. S37.** SEM images of a) DMTP-TPB-COF, b) DMTP-TPB-COF-H, c) TFPA-TTA-COF and d) TFPA-TTA-COF-H.

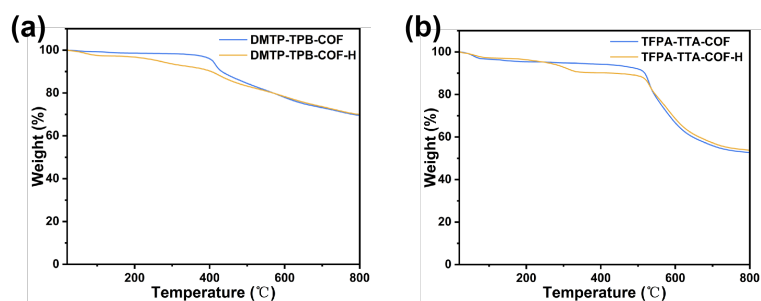

**Fig. S38.** TGA profiles of a) DMTP-TTA-COF and b) TFPA-TPB-COF before and after imine-to-quinoline conversion, tested under N<sub>2</sub> with rate 10 °C/min.

## Chemical Stability Test

The as-synthesized TFPB-TPB-COF and TFPB-TPB-COF-H were separately placed in glass vials containing 5 mL of respective test media: both COFs were exposed to 12 M HCl, 12 M NaOH, 5 M KMnO<sub>4</sub> (in acetonitrile), and 5 M NaBH<sub>4</sub> (in THF); additionally, TFPB-TPB-COF-H was further tested in DMSO, ethanol, acetonitrile, and H<sub>2</sub>O. A magnetic stir bar was added to each vial, and all mixtures were stirred for 72 h. Subsequently, the samples were transferred to a Buchner funnel, washed sequentially with distilled water and THF until the filtrate became colorless. The washed samples were dried overnight at 110 °C under high vacuum, followed by powder X-ray diffraction (PXRD) measurements.

## One-Pot Mechanochemical vs Solvothermal Routes

**Table S1.** Summary and comparison of synthesis methods for five representative quinoline-linked COFs.

| Quinoline-linked COFs | Solvent                     | Temp (°C) | Time (h) | Atmosphere            | Crystallinity | Yield (%) | BET surface area (m <sup>2</sup> /g) | Ref       |
|-----------------------|-----------------------------|-----------|----------|-----------------------|---------------|-----------|--------------------------------------|-----------|
| TTB-TTA-COF-H         | dioxane, mesitylene/toluene | 120       | 72/48    | vacuum/N <sub>2</sub> | high          | NR        | 709.1                                | 38        |
|                       | o-DCB, <i>n</i> -BuOH       | 120       | 72       | N <sub>2</sub>        | high          | 76.3      | 921.5                                | 18        |
|                       | o-DCB, <i>n</i> -BuOH       | 120       | 72       | vacuum/N <sub>2</sub> | high          | 95        | 1739                                 | 17        |
|                       | mesitylene                  | RT        | 3.5      | air                   | high          | 90.5      | 1538.7                               | This work |
| TTB-TTA-COF-F         | dioxane, mesitylene/DMF     | 120/110   | 72/72    | vacuum/N <sub>2</sub> | high          | NR        | 1716.1                               | 41        |
|                       | mesitylene                  | RT        | 3.5      | air                   | high          | 87.6      | 1380.1                               | This work |
| TTB-TPB-COF-H         | o-DCB, <i>n</i> -BuOH       | 120       | 72       | vacuum/N <sub>2</sub> | high          | 73        | 1590                                 | 42        |
|                       | mesitylene                  | RT        | 3.5      | air                   | high          | 92.2      | 540                                  | This work |
| DMTP-TPB-COF-H        | o-DCB, <i>n</i> -BuOH       | 120       | 72       | N <sub>2</sub>        | high          | 95        | 1305.4                               | 16        |
|                       | o-DCB,                      | 120/110   | 72/72    | vacuum/N <sub>2</sub> | high          | NR        | 955                                  | 15        |

|                            |                                          |         |       |                       |      |      |        |           |
|----------------------------|------------------------------------------|---------|-------|-----------------------|------|------|--------|-----------|
|                            | <i>n</i> -BuOH/toluene                   |         |       |                       |      |      |        |           |
|                            | <i>o</i> -DCB,<br><i>n</i> -BuOH/toluene | 120/110 | 72/72 | vacuum/N <sub>2</sub> | high | NR   | 940    | 19        |
|                            | mesitylene                               | RT      | 3.5   | air                   | high | 78.9 | 179    | This work |
| <b>TFPA-TTA<br/>-COF-H</b> | dioxane, mesitylene                      | 120     | 72    | vacuum/N <sub>2</sub> | high | 78.2 | 1058.9 | 14        |
|                            | dioxane, mesitylene                      | 120     | 72    | vacuum/N <sub>2</sub> | high | 89   | 1720   | 40        |
|                            | mesitylene                               | RT      | 3.5   | air                   | high | 68.6 | 553.1  | This work |

**Note:** In the table, the expression logic of process parameters is as follows: For the stepwise process, the parameters are presented as "120 °C/110 °C" and "72 h/72 h", where the parameters before the "/" correspond to the first-step process conditions (120 °C, 72 h), and those after the "/" correspond to the second-step process conditions (110 °C, 72 h); for the one-pot process, the parameters are directly denoted as 120 °C and 72 h; RT: room-temperature; "NR": not reported in the literature.
